# Supplementary material for: The effects of liraglutide and dapagliflozin on cardiac function and structure in a multi-hit mouse model of heart failure with preserved ejection fraction
Source: PubMed Central journal article supplement — Cardiovasc Res. 2020 Sep 1;117(9):2108–24. doi: 10.1093/cvr/cvaa256 (PMC8318109; doi:10.1093/cvr/cvaa256), 2020-09-01
Supplement: cvaa256_supplementary_data.pdf [file cvaa256_supplementary_data.pdf]

1 **The effects of liraglutide and dapagliflozin on cardiac function and structure in a multi-hit**  
2 **mouse model of Heart Failure with Preserved Ejection Fraction**

3  
4 Coenraad Withaar<sup>1</sup>, Laura M.G. Meems<sup>1</sup>, George Markousis-Mavrogenis<sup>1</sup>, Cornelis J. Boogerd<sup>3</sup>,  
5 Herman H.W. Silljé<sup>1</sup>, E. Marloes Schouten<sup>1</sup>, Martin M. Dokter<sup>1</sup>, Adriaan A. Voors<sup>1</sup>, B. Daan  
6 Westenbrink<sup>1</sup>, Carolyn S.P. Lam<sup>2</sup>, Rudolf A. de Boer<sup>1</sup>

7  
8  
9 <sup>1</sup>Department of Cardiology, University Medical Center Groningen, University of Groningen, The  
10 Netherlands

11 <sup>2</sup>National University Heart Centre, Singapore

12 <sup>3</sup>Hubrecht Institute, Royal Netherlands Academy of Arts and Sciences and University Medical  
13 Center Utrecht, The Netherlands.

14  
15  
16 Short title: Liraglutide and dapagliflozin in a HFpEF mouse model

17  
18  
19  
20  
21 Corresponding author:

22 Prof. dr. R.A. de Boer

23 Department of Cardiology, University Medical Center Groningen

24 University of Groningen

25 Hanzeplein 1, 9713 GZ Groningen, The Netherlands

26 P.O. Box 30.001, 9700 RB Groningen, The Netherlands

27 Phone: +31-50-3612355 / +31-50-3615340

28 Fax: +31-50-3611347

29  
30 E-mail:

31 [r.a.de.boer@umcg.nl](mailto:r.a.de.boer@umcg.nl)

32  
33  
34  
35 **SUPPLEMENTARY DATA**  
36

|                                     | CTRL        | HFD         | CTRL+<br>ANGII | HFD+<br>ANGII |
|-------------------------------------|-------------|-------------|----------------|---------------|
| <b>Echocardiographic parameters</b> | n=9         | n=8         | n=7            | n=11          |
| FS (%)                              | 32.7 ± 1.9  | 31.8 ± 2.7  | 28.3 ± 1.7     | 30.0 ± 2.2    |
| EF (%)                              | 61.2 ± 3.1  | 59.4 ± 3.7  | 59.4 ± 2.5     | 56.9 ± 2.9    |
| LVIDs (mm)                          | 2.6 ± 0.1   | 3.0 ± 0.2   | 2.7 ± 0.2      | 3.0 ± 0.1     |
| LVIDd (mm)                          | 4.0 ± 0.1   | 4.4 ± 0.1   | 3.7 ± 0.2      | 4.2 ± 0.1     |
| LVPWs (mm)                          | 1.4 ± 0.1   | 1.6 ± 0.0   | 1.5 ± 0.2      | 1.8 ± 0.1*    |
| LVPWd (mm)                          | 1.0 ± 0.1   | 1.14 ± 0.1  | 1.2 ± 0.2      | 1.3 ± 0.1*    |
| LVAWs (mm)                          | 1.4 ± 0.1   | 1.7 ± 0.1   | 1.8 ± 0.1*     | 1.8 ± 0.1*    |
| LVAWd (mm)                          | 1.0 ± 0.0   | 1.3 ± 0.1*  | 1.3 ± 0.1*     | 1.4 ± 0.1*    |
| HR (bpm)                            | 406 ± 11.4  | 429 ± 14.1  | 418 ± 18.4     | 406 ± 14.9    |
| CO (L/min)                          | 17.5 ± 2.0  | 22.6 ± 2.0  | 15.3 ± 1.5     | 18.1 ± 1.2    |
| GLS                                 | -21.4 ± 1.1 | -17.9 ± 1.2 | -16.9 ± 0.8*   | -14.1 ± 0.6*  |
| RPLSR                               | 10.7 ± 0.8  | 9.4 ± 0.8   | 7.9 ± 0.9      | 7.5 ± 0.7*    |
| <b>Aortic catheterization</b>       | n=9         | n=9         | n=5            | n=9           |
| Pmax aorta                          | 105 ± 2.1   | 117 ± 4.0*  | 120 ± 5.3*     | 128 ± 5.9*    |
| Pmin aorta                          | 66 ± 2.3    | 76 ± 3.0    | 79 ± 6.2       | 73 ± 6.6      |
| Pmean aorta                         | 84 ± 2.3    | 96 ± 3.3    | 99 ± 5.9       | 97 ± 6.5      |

38 **Supplemental table 1. Echocardiographic parameters and aortic catheterization**

39 FS = fractional shortening. EF = Ejection fraction. LVIDs = Left ventricular internal diameter in systole LVIDd = Left  
40 ventricular internal diameter in diastole. LVPWs = Left ventricular posterior wall thickness in systole. LVPWd = Left  
41 ventricular posterior wall thickness in diastole. LVAWs = Left ventricular anterior wall thickness in systole; LVAWd =  
42 Left ventricular anterior wall thickness in diastole. HR = Heart rate. CO = cardiac output. GLS = global longitudinal  
43 strain as marker of myocardial deformation RPLSR = Quantification of reverse peak longitudinal strain rate (RPLSR)  
44 as marker of diastolic function. Pmax = maximal aortic pressure. Pmin = minimal aortic pressure. Pmean = average  
45 aortic pressure.

46 CTRL = control chow. HFD = high fat diet. CTRL+ANGII = Angiotensin-II treated group on control chow. HFD+ANGII =  
47 Angiotensin-II treated group on high fat diet. Kruskal Wallis test followed by Mann-Witney-U. \* compared to CTRL.  
48 † compared to HFD. Data are presented as means ± standard error of the mean

49

|                                        | HFD+      | HFD+       | HFD+       |
|----------------------------------------|-----------|------------|------------|
|                                        | ANGII+    | ANGII+     | ANGII+     |
|                                        | SALINE    | LIRA       | DAPA       |
| <b>A) Echocardiographic parameters</b> | n=13      | n=13       | n=13       |
| FS (%)                                 | 29.8±2.4  | 36.3±2.6   | 31.4±1.8   |
| EF (%)                                 | 61.3±2.7  | 65.8±3.3   | 59.6±2.6   |
| LVIDs (mm)                             | 2.5±0.1   | 2.3±0.2    | 2.6±0.2    |
| LVIDd (mm)                             | 3.7±0.1   | 3.5±0.1    | 3.7±0.2    |
| LVPWs (mm)                             | 1.9±0.1   | 1.7±0.1    | 1.7±0.1    |
| LVPWd (mm)                             | 1.5±0.1   | 1.2±0.1*   | 1.3±0.1    |
| LVAWs (mm)                             | 1.7±0.1   | 1.5±0.1*   | 1.8±0.1    |
| LVAWd (mm)                             | 1.3±0.03  | 1.1±0.1*   | 1.3±0.0    |
| HR (bpm)                               | 418±12.5  | 413±23.5   | 428±12.8   |
| CO (L/min)                             | 14.0±1.1  | 13.9±1.0   | 15.2±1.6   |
|                                        | n=10      | n=9        | n=13       |
| GLS (%)                                | -15.8±0.6 | -18.9±1.2* | -18.1±0.8* |
| RPLSR (1/s)                            | 8.1±0.5   | 8.7±0.8    | 9.6±0.9    |
| <b>B) Organ weights</b>                | n=14      | n=13       | n=13       |
| HW/tibia length (mg/mm)                | 9.9±0.3   | 8.4±0.3*   | 10.8±0.6   |
| LV/tibia length (mg/mm)                | 8.1±0.3   | 6.6±0.2*   | 8.6±0.4    |
| RV/tibia length (mg/mm)                | 1.4±0.1   | 1.3±0.1    | 1.6±0.1    |
| Atria/tibia length (mg/mm)             | 0.6±0.0   | 0.4±0.0*   | 0.7±0.1    |
| Lung/tibia length (mg/mm)              | 12.6±0.5  | 10.8±0.3*  | 13.2±0.7   |

51

52 **Supplemental table 2. Echocardiographic parameters and organ weights.**

53 **A) Echocardiographic parameters.** FS = fractional shortening. EF = ejection fraction. LVIDs = left ventricular internal  
54 diameter in systole LVIDd = Left ventricular internal diameter in diastole. LVPWs = Left ventricular posterior wall  
55 thickness in systole. LVPWd = Left ventricular posterior wall thickness in diastole. LVAWs = Left ventricular anterior  
56 wall thickness in systole. LVAWd = Left ventricular anterior wall thickness in diastole. HR = Heart rate. CO = Cardiac  
57 output. GLS = global longitudinal strain as marker of myocardial deformation. RPLSR = Quantification of reverse  
58 peak longitudinal strain rate (RPLSR) as marker of diastolic function.

59 **B) Organ weights.** HW = total heart weight. LV = Left ventricle. RV=right ventricle. All weights are corrected for tibia  
60 length.

61 HFD+ANGII+Lira = high fat diet + Angiotensin-II with daily liraglutide injection. HFD+ANGII+Dapa = high fat diet +  
62 Angiotensin-II with dapagliflozin treatment. Data are means ± standard error of the mean. \* = P<0.05 is considered  
63 significant compared to HFD+ANGII+Saline.

64

| <b>Gene</b>   | <b>Protein</b> | <b>5' - 3' forward</b>  | <b>5' - 3' reverse</b>   |
|---------------|----------------|-------------------------|--------------------------|
| <i>Nppa</i>   | ANP            | ATGGGCTCCTTCTCCATCAC    | TCTACCGGCATCTTCTCCTC     |
| <i>TIMP-1</i> | TIMP-1         | CTGCTCAGCAAAGAGCTTTC    | CTCCAGTTTGCAAGGGATAG     |
| <i>Col1a1</i> | Col1a1         | CTTCACCTACAGCACCCCTTGTG | CTTGGTGGTTTTGTATTCGATGAC |
| <i>Col3a1</i> | Col3a1         | GCGATTCAAGGCTGAAG       | GGGTGCGATATCTATGATGG     |
| <i>Il-6</i>   | IL-6           | TCCCAACAGACCTGTCTATAC   | CAGAATTGCCATTGCACAACCTC  |
| <i>HAVCR1</i> | KIM-1          | AAACCAGAGATTCCCACACG    | GTCGTGGGTCTTCTGTAGC      |
| <i>CLU</i>    | Clusterin      | GAAGATGAACGGGCCAGTGTG   | TACTGCTCTGTCAGCCTCTC     |
| <i>Rplp0</i>  | 36B4           | AAGCGCGTCCTGGCATTGTC    | GCAGCCGCAAATGCAGATGG     |

66 **Supplemental table 3. List of primers used in this study.**

| Full name                                                                                          | protein   | Uniprot code |
|----------------------------------------------------------------------------------------------------|-----------|--------------|
| Amlyloid beta A4 precursor protein-binding family B member, 1-interacting protein (Apbb1ip) Q8R5A3 | apbb1ip   | Q8R5A3       |
| Appetite-regulating hormone (Ghr1) Q9EQX0                                                          | Ghr1      | Q9EQX0       |
| Aryl hydrocarbon receptor (Ahr) P30561                                                             | Ahr       | P30561       |
| Axin-1 (Axin1) O35625                                                                              | Axin1     | O35625       |
| C-C motif chemokine 2 (Ccl2) P10148                                                                | Ccl2      | P10148       |
| C-C motif chemokine 20 (Ccl20) O89093                                                              | Ccl20     | O89093       |
| C-C motif chemokine 3 (Ccl3) P10855                                                                | Ccl3      | P10855       |
| C-C motif chemokine 5 (Ccl5) P30882                                                                | Ccl5      | P30882       |
| C-X-C motif chemokine 9 (Cxcl9) P18340                                                             | Cxcl9     | P18340       |
| Cadherin-6 (Cdh6) P97326                                                                           | Cdh6      | P97326       |
| Calsynenin-2 (Clstn2) Q9ER65                                                                       | Clstn2    | Q9ER65       |
| Carbonic anhydrase 13 (Ca13) Q9D6N1                                                                | Ca13      | Q9D6N1       |
| Carboxypeptidase E (Cpe) Q00493                                                                    | Cpe       | Q00493       |
| Caspase-3 (Casp3) P70677                                                                           | Casp3     | P70677       |
| Contactin-1 (Cntn1) P12960                                                                         | Cntn1     | P12960       |
| Contactin-4 (Cntn4) Q69226                                                                         | Cntn4     | Q69226       |
| CXADR-like membrane protein (Clmp) Q8R373                                                          | Clmp      | Q8R373       |
| Cysteine-rich motor neuron 1 protein (Crim1) Q9JL10                                                | Crim1     | Q9JL10       |
| Cytosolic phospholipase A2 (Pla2g4a) P47713                                                        | Pla2g4a   | P47713       |
| Delta-like protein 1 (Dll1) Q61483                                                                 | Dll1      | Q61483       |
| Dihydropteridine reductase (Qdpr) Q8BV14                                                           | Qdpr      | Q8BV14       |
| Disintegrin and metalloproteinase domain-containing protein 23 (Adam23) Q9R1V7                     | Adam23    | Q9R1V7       |
| Dual specificity mitogen-activated protein kinase kinase 6 (Map2k6) P70236                         | Map2k6    | P70236       |
| Dynactin subunit 2 (Dctn2) Q99KJ8                                                                  | Dctn2     | Q99KJ8       |
| Epithelial cell adhesion molecule (Epcam) Q99JWS                                                   | Epcam     | Q99JWS       |
| Erythropoietin (Epo) P07321                                                                        | Epo       | P07321       |
| Follistatin (Fst) P47931                                                                           | Fst       | P47931       |
| Follistatin-related protein 3 (Fstl3) Q9EQC7                                                       | Fstl3     | Q9EQC7       |
| Forkhead box protein O1 (Foxo1) Q9R1E0                                                             | Foxo1     | Q9R1E0       |
| Friend leukemia integration 1 transcription factor (Flil1) P26323                                  | Flil1     | P26323       |
| Gamma-enolase (Eno2) P17183                                                                        | Eno2      | P17183       |
| GDNF family receptor alpha-1 (Gfra1) P97785                                                        | Gfra1     | P97785       |
| Glial cell line-derived neurotrophic factor (Gdnf) P48540                                          | Gdnf      | P48540       |
| Glucagon (Gcg) P55095                                                                              | Gcg       | P55095       |
| Granulocyte-macrophage colony-stimulating factor (Csf2) P01587                                     | Csf2      | P01587       |
| Growth-regulated alpha protein (Cxcl1) P12850                                                      | Cxcl1     | P12850       |
| Hepatocyte growth factor (Hgf) Q08048                                                              | Hgf       | Q08048       |
| Immunoglobulin superfamily member 3 (Igsf3) Q6ZQA6                                                 | Igsf3     | Q6ZQA6       |
| Integrin beta-1-binding protein 2 (Itgb1bp2) Q9R000                                                | Itgb1bp2  | Q9R000       |
| Integrin beta-6 (Itgb6) Q9Z0T9                                                                     | Itgb6     | Q9Z0T9       |
| Interleukin-1 alpha (Il1a) P01582                                                                  | Il1a      | P01582       |
| Interleukin-1 beta (Il1b) P10749                                                                   | Il1b      | P10749       |
| Interleukin-10 (Il10) P18893                                                                       | Il10      | P18893       |
| Interleukin-17A (Il17a) Q62386                                                                     | Il17a     | Q62386       |
| Interleukin-17F (Il17f) Q7TNI7                                                                     | Il17f     | Q7TNI7       |
| Interleukin-23 receptor (Il23r) Q8K4B4                                                             | Il23r     | Q8K4B4       |
| Interleukin-5 (Il5) P04401                                                                         | Il5       | P04401       |
| Interleukin-6 (Il6) P08505                                                                         | Il6       | P08505       |
| Kit ligand (Kitlg) P20826                                                                          | Kitlg     | P20826       |
| Legumain (Lgmn) O89017                                                                             | Lgmn      | O89017       |
| Leucine-rich repeat transmembrane protein FLRT2 (Flrt2) Q8BLUO                                     | Flrt2     | Q8BLUO       |
| Lipoprotein lipase (Lpl) P11152                                                                    | Lpl       | P11152       |
| Matrilin-2 (Matn2) O08746                                                                          | Matn2     | O08746       |
| Melanoma-derived growth regulatory protein (Mia) Q61865                                            | Mia       | Q61865       |
| N(G),N(G)-dimethylarginine dimethylaminohydrolase 1 (Odah1) Q9CWS0                                 | ddah1     | Q9CWS0       |
| NAD kinase (Nadk) P58058                                                                           | Nadk      | P58058       |
| Neurogenic locus notch homolog protein 3 (Notch3) Q61982                                           | Notch3    | Q61982       |
| Neurotrophin-3 (Ntf3) P20181                                                                       | Ntf3      | P20181       |
| Perilipin-1 (Plin1) Q8CGN5                                                                         | Plin1     | Q8CGN5       |
| Peroxisredoxin-5, mitochondrial (Prdx5) P99029                                                     | Prdx5     | P99029       |
| Platelet-derived growth factor subunit B (Pdgfb) P31240                                            | Pdgfb     | P31240       |
| Plexin-A4 (Plxna4) Q80UG2                                                                          | Plxna4    | Q80UG2       |
| Poly [ADP-ribose] polymerase 1 (Parp1) P11103                                                      | Parp1     | P11103       |
| Protein CYR61 (Cyr61) P18406                                                                       | Cyr61     | P18406       |
| Protein delta homolog 1 (Dlk1) Q09163                                                              | Dlk1      | Q09163       |
| Protein phosphatase inhibitor 2 (Ppp1r2) Q9DCL8                                                    | Ppp1r2    | Q9DCL8       |
| Protein S100-A4 (S100a4) P07091                                                                    | S100a4    | P07091       |
| Protransforming growth factor alpha (Tgfa) P48030                                                  | Tgfa      | P48030       |
| Receptor tyrosine-protein kinase erbB-4 (Erbb4) Q61527                                             | Erbb4     | Q61527       |
| Repulsive guidance molecule A (Rgma) Q6PCX7                                                        | Rgma      | Q6PCX7       |
| Ribosomal oxygenase 2 (Riox2) Q8CD15                                                               | Riox2     | Q8CD15       |
| Seizure 6-like protein 2 (Sez6l2) Q4V9Z5                                                           | Sez6l2    | Q4V9Z5       |
| Serine/threonine-protein kinase PAK 4 (Pak4) Q8BTW9                                                | Pak4      | Q8BTW9       |
| Serine/threonine-protein kinase receptor R3 (Acvr1) Q61288                                         | Acvr1     | Q61288       |
| Soluble calcium-activated nucleotidase 1 (Cant1) Q8VCF1                                            | Cant1     | Q8VCF1       |
| Synaptosomal-associated protein 29 (Snap29) Q9ERB0                                                 | Snap29    | Q9ERB0       |
| Tenascin-R (Tnr) Q8BYI9                                                                            | Tnr       | Q8BYI9       |
| Transforming growth factor beta receptor type 3 (Tgfb3) O88393                                     | Tgfb3     | O88393       |
| Latency-associated peptide transforming growth factor beta-1 (Tgfb1) P04202                        | Tgfb1     | P04202       |
| Tripeptidyl-peptidase 1 (Tpp1) O89023                                                              | Tpp1      | O89023       |
| Troponin I, cardiac muscle (Tnni3) P48787                                                          | Tnni3     | P48787       |
| Tumor necrosis factor (Tnf) P06804                                                                 | Tnf       | P06804       |
| Tumor necrosis factor ligand superfamily member 12 (Tnfsf12) O54907                                | Tnfsf12   | O54907       |
| Tumor necrosis factor receptor superfamily member 11B (Tnfrsf11b) O08712                           | Tnfrsf11b | O08712       |
| Tumor necrosis factor receptor superfamily member 12A (Tnfrsf12a) Q9CR75                           | Tnfrsf12a | Q9CR75       |
| Tumor necrosis factor receptor superfamily member 27 (Eda2r) Q8BX35                                | Eda2r     | Q8BX35       |
| Tumor necrosis factor receptor superfamily member 6 (Fas) P25446                                   | Fas       | P25446       |
| Tyrosine-protein kinase Yes (Yes1) Q04736                                                          | Yes1      | Q04736       |
| V-set and immunoglobulin domain-containing protein 2 (Vsig2) Q9Z109                                | Vsig2     | Q9Z109       |
| Vascular endothelial growth factor D (Vegfd) P97946                                                | Vegfd     | P97946       |
| WAP, Kazal, immunoglobulin, Kunitz and NTR domain-containing protein 2 (Wfikkn2) Q7TQN3            | Wfikkn2   | Q7TQN3       |
| WNT1-inducible-signaling pathway protein 1 (Wisp1) O54775                                          | Wisp1     | O54775       |

| Pathway                                                             | padj   | NES  | leadEdge                                                                                                                                                                                                                                                                                                                                                                                                                                                                                                                                                                |
|---------------------------------------------------------------------|--------|------|-------------------------------------------------------------------------------------------------------------------------------------------------------------------------------------------------------------------------------------------------------------------------------------------------------------------------------------------------------------------------------------------------------------------------------------------------------------------------------------------------------------------------------------------------------------------------|
| GO_EXTRACELLULAR_STRUCTURE_ORGANIZATION                             | <0.001 | 2,81 | COL6A3, COL5A2, COL8A1, COL12A1, COL1A2, BGN, SPARC, MFAP5, COL4A1, COL4A2, COL1A1, TGFB2, COL5A1, COL6A2, COL16A1, VCAN, LOXL1, LOXL2, COL3A1, SULF1, POSTN, LAMC1, LOX, LTBP2, TNC, COL6A1, ITGA9, ADAMTS2, LUM, MFAP4, ELN, ADAMTS12, ITGB5, TIMP1, TGFB1, ANXA2, CAPG, COL4A4, FN1, LAMA2, MMP2, COL4A3, NID1, CD44, ITGB1, GPM6B, SPP1, ITGA6, COL4A5, ADAMTS5, ITGAV, LAMB1, CAPN2, APP, ADAM10, COL18A1, DCN, COMP, DDR2, CTSK, P4HA1, HSPG2, LAMA3, TNFRSF11B, ATXN1L, MMP14, RIPK1, HSD17B12, SERPINE1, CCDC80, PTK2, KDR, ACAN, ITGA5, FBLN5, ADAMTS20,       |
| GO_COLLAGEN_FIBRIL_ORGANIZATION                                     | <0.001 | 2,53 | COL5A2, COL12A1, COL1A2, COL1A1, TGFB2, COL5A1, LOXL2, COL3A1, LOX, ADAMTS2, LUM, TGFB1, ANXA2, DDR2, P4HA1, CYP1B1, NF1, SFRP2, ATP7A                                                                                                                                                                                                                                                                                                                                                                                                                                  |
| GO_MULTICELLULAR_ORGANISMAL_MACROMOLECULE_METABOLIC_PROCESS         | <0.001 | 2,53 | COL6A3, COL5A2, COL8A1, COL12A1, COL1A2, COL4A1, COL4A2, COL1A1, COL5A1, COL6A2, ACE, COL3A1, COL6A1, ADAMTS2, COL15A1, COL4A4, MMP2, COL4A3, COL4A5, COL18A1, CTSK, MMP14, HIF1A, COL8A2, CTSK, ADAM15                                                                                                                                                                                                                                                                                                                                                                 |
| GO_MULTICELLULAR_ORGANISM_METABOLIC_PROCESS                         | <0.001 | 2,42 | COL6A3, COL5A2, COL8A1, COL12A1, COL1A2, COL4A1, COL4A2, COL1A1, COL5A1, COL6A2, ACE, COL3A1, CLIC5, COL6A1, ADAMTS2, COL15A1, COL4A4, MMP2, COL4A3, COL4A5, COL18A1, CTSK, MMP14, HIF1A, COL8A2, CTSK, TRPV4, ADAM15                                                                                                                                                                                                                                                                                                                                                   |
| GO_CELLULAR_RESPONSE_TO_AMINO_ACID_STIMULUS                         | <0.001 | 2,34 | COL5A2, COL1A2, COL4A1, COL1A1, COL16A1, COL3A1, COL6A1, MMP2, ZEB1, CAPN2, UBR1, HMGCS2, CPEB1, PDGFC, IPO5, EGFR, CPEB4                                                                                                                                                                                                                                                                                                                                                                                                                                               |
| GO_CYTOSKELETON_DEPENDENT_CYTOKINESIS                               | <0.001 | 2,20 | MYH10, APC, SPIRE1, RACGAP1, ANLN, ZNF365, KIF20A, CEP55, SPTBN1, ANK3, CKAP2, KIF4A, ACTR3, SPAST, USP8, ACTR2, RHOA, RASA1, AURKB, SNX18                                                                                                                                                                                                                                                                                                                                                                                                                              |
| GO_CYTOKINESIS                                                      | <0.001 | 2,18 | MYH10, RHOC, ROCK2, APC, SPIRE1, RACGAP1, DIAPH2, MYH9, ANLN, ZNF365, BECN1, ECT2, KIF20A, KIF13A, NEK7, PRC1, CEP55, ZFYVE26, SEPT5, SPTBN1, ANK3, CKAP2, KIF4A, ACTR3, SPAST, USP8, RAB11FIP3, ACTR2, RHOA, RASA1, BIRC5, SEPT7, MAP9, AHCTF1, INCENP, AURKB, SNX18, NEK6                                                                                                                                                                                                                                                                                             |
| GO_REGULATION_OF_CELL_SUBSTRATE_ADHESION                            | <0.001 | 2,16 | COL8A1, FBLN2, COL1A1, COL16A1, POSTN, ROCK2, FN1, NID1, ITGB1, GPM6B, SFRP1, PTK2B, BCL2, ACTN4, UTRN, FLNA, GSK3B, PTPRJ, PTEN, MMP14, HSD17B12, SERPINE1, CCDC80, JAK2, PTK2, FZD4, KDR, ITGA5, THBS1, EFNAS, DDR1, S100A10, PHLD2, FMN1, MACF1, ARPC2, GCNT2, KANK1, ADAM15, SLK, NF1, FZD7, NF2, RCC2, CD36, CDC42, NINJ1, TBCE, STG6A1, RASA1, CORO1C, ROCK1, SMOCC2, APOD, PLAU, RSU1, NPNT, APOA1, PIK3CB, LGALS1, ARHGEF7                                                                                                                                      |
| GO_POSITIVE_REGULATION_OF_SMALL_GTPASE_MEDIATED_SIGNAL_TRANSDUCTION | <0.001 | 2,14 | COL3A1, LPAR1, IGF1, F2R, AKAP13, F2RL1, SOS1, CDON, SHOC2, NOTCH2, RASGEF1A, RASGRP1, ABRA, ARRB1, ALS2, ROBO1, KITLG                                                                                                                                                                                                                                                                                                                                                                                                                                                  |
| GO_TISSUE_MIGRATION                                                 | <0.001 | 2,13 | LOXL2, ACTA1, TGFB1, PTPN11, ITGB1, PTK2B, ZEB2, ARSB, PTEN, PKN1, MYH9, ANLN, PTK2, KDR, AMOT, CYP1B1, PKN3, SOX18, FGF2, PIK3CA, NANOS1, ROBO1, RHOA, PKN2, ACTG2, GPX1, APOA1                                                                                                                                                                                                                                                                                                                                                                                        |
| GO_TISSUE_REMODELING                                                | <0.001 | 2,12 | BGN, TGFB2, ACE, THBS4, TGFB3, ANXA1, F2R, PTK2B, NOX4, SEMA3C, LIPA, IGFBP5, CTSK, MMP14, JAG1, AXL, CSPG4, MEFC2, BMP2, HIF1A, NOTCH2, IL6, ATP7A, UF, CCR2, CTHRC1, BAK1, MDM2, TGFB1, LGR4                                                                                                                                                                                                                                                                                                                                                                          |
| GO_MITOTIC_CYTOKINESIS                                              | <0.001 | 2,11 | MYH10, APC, RACGAP1, ANLN, ZNF365, KIF20A, CEP55, SPTBN1, ANK3, CKAP2, KIF4A, SPAST, USP8, RHOA, RASA1                                                                                                                                                                                                                                                                                                                                                                                                                                                                  |
| GO_ENDODERM_DEVELOPMENT                                             | <0.001 | 2,10 | COL8A1, COL12A1, COL4A2, LAMC1, COL6A1, ITGB5, FN1, MMP2, ITGAV, LAMB1, EXT1, BMP1A, INHBA, LAMA3, SMAD4, TBX20, MMP14, ITGA5, ARC, BPTF, DUSP4                                                                                                                                                                                                                                                                                                                                                                                                                         |
| GO_RESPONSE_TO_TRANSFORMING_GROWTH_FACTOR_BETA                      | <0.001 | 2,10 | COL1A2, COL4A2, COL1A1, TGFB2, COL3A1, STAR, POSTN, LTBP2, TGFB3, ANKRD1, ITGB5, ADAM9, TGFB1, CBL, SKIL, BAMBI, FN1, ITGB1, HIPK2, GDF15, SFRP1, NOX4, USP9X, CX3CR1, BMP1A, SMAD4, PTK2, MEFC2, MAP3K7, ACVR1, GCNT2, SOX9, FYN, USP15, KLF10, FKBP1A, TGFB2                                                                                                                                                                                                                                                                                                          |
| GO_HEAD_MORPHOGENESIS                                               | <0.001 | 2,09 | COL1A1, TGFB2, TGFB3, PTPN11, MMP2, ARID5B, RAB3GAP1, PLEKHA1, NIPBL, CRISPLD1, ANKRD11, ASPH, RRAS, TGFB1, CRISPLD2, SGPL1, LRP6                                                                                                                                                                                                                                                                                                                                                                                                                                       |
| GO_AMINOGLYCAN_CATABOLIC_PROCESS                                    | <0.001 | 2,09 | BGN, VCAN, SDC2, LUM, PRELP, CD44, DCN, HMMR, HSPG2, ARSB, GALNS, ACAN, CSPG4, FGF2, GPC6, IDS, TGFB1, CHI3L1, SDC3, SDC1, CTBS, CHID1, HYAL2, HEXB, FMOD, GUSB                                                                                                                                                                                                                                                                                                                                                                                                         |
| GO_CELL_GROWTH                                                      | <0.001 | 2,08 | EMP1, TGFB2, POSTN, SORBS2, TGFB3, ACTA1, NUPR1, MTPN, IQGAP1, ITGB1, SEMA3F, MTOR, ITGAV, USP9X, APP, BCL2, SPG11, ULK2, MAP1B, PDLIM5, ZEB2, RAPH1, EMP3, DCLK1, EFNAS, SEC61A1, CYFIP1, SOCS5, NOTCH2, DGDK, NPPA, SOX9, IL6, SEMA7A, NRP2, MEX3C, TGFB2, XRN2, TYMS, NOP58, SLIT3, SLC9A6, TGFB1                                                                                                                                                                                                                                                                    |
| GO_CELL_JUNCTION_ORGANIZATION                                       | <0.001 | 2,07 | XIRP2, TGFB2, FLNC, LAMC1, TGFB3, ACTN1, DST, HEG1, RHOC, FN1, ITGB1, TLN1, APC, ITGA6, PTK2B, MTDH, STRN, PDPK1, BCL2, ACTN4, FLNA, DLG5, CTTN, LAMA3, PRKCA, SORBS1, ITGA5, AMOT, ECT2, MPP7, MPP5, DLG1, TRPV4, FSCN1, HIPK1, CDH4, LAMC2, CDH11, NUMBL, RAB8B, NF2, RCC2, TJP1, CDC42, DSP, THY1, TGFB1, PLEC, CTNND1, TBCE, VAMP1, RHOA, PKN2, CD151, CSF1R, NFASC, SMAD7, CADM3                                                                                                                                                                                   |
| GO_VASCULATURE_DEVELOPMENT                                          | <0.001 | 2,07 | COL8A1, COL1A2, COL4A1, COL4A2, COL1A1, TGFB2, COL5A1, LOXL1, LOXL2, MYH10, SRPX2, COL3A1, LOX, EREG, SYK, PDGFRA, COL15A1, CALCRL, TGFB1, PKD1, ANXA2, HEG1, PKD2, MFGE8, FN1, MMP2, ITGB1, CD34, LRP1, ITGAV, PTK2B, LUZP1, STK4, COL18A1, UNC5B, SEMA3C, CX3CL1, TNFRSF12A, RAPGEF1, SPHK1, EIF2AK3, HSPG2, TBX20, PTEN, MMP14, JAG1, SERPINE1, SOS1, MYH9, PTK2, FZD4, PRKCA, KDR, MIB1, ANGPTL4,                                                                                                                                                                   |
| GO_EPIBOLY                                                          | <0.001 | 2,06 | COL5A1, HBEGF, RHOC, FLNA, ITGA5, DDR1, ADAM17, LCP1, MMP12, RHOA                                                                                                                                                                                                                                                                                                                                                                                                                                                                                                       |
| GO_ANGIOGENESIS                                                     | <0.001 | 2,05 | COL8A1, COL4A1, COL4A2, TGFB2, LOXL2, SRPX2, EREG, SYK, PDGFRA, COL15A1, CALCRL, TGFB1, ANXA2, MFGE8, FN1, MMP2, ITGB1, CD34, ITGAV, PTK2B, STK4, COL18A1, UNC5B, CX3CL1, TNFRSF12A, EIF2AK3, HSPG2, TBX20, PTEN, MMP14, JAG1, SERPINE1, MYH9, PTK2, PRKCA, KDR, ANGPTL4, ITGA5, CSPG4, MED1, THBS1, CYP1B1, HIF1A, SOX18, COL8A2, THSD7A, FGFR1, FGF2, ACVR1, ARHGAP24, ADAM15, PIK3CA, GNA13, SFRP2, PTPRB, NUS1, NRP2, FMNL3, BAK1, TGFB2, SETD2, CDC42, HMOX1, NAA15, THY1, ROBO1, POFUT1, ECM1, AGGF1, NCL, VEZF1, PARVA, SPI1, C1GALT1, PIK3CG, FGF6, APOD, PLAU, |
| GO_ENDODERM_FORMATION                                               | <0.001 | 2,04 | COL8A1, COL12A1, COL4A2, COL6A1, ITGB5, FN1, MMP2, ITGAV, LAMB1, INHBA, LAMA3, TBX20, MMP14, ITGA5                                                                                                                                                                                                                                                                                                                                                                                                                                                                      |
| GO_INTEGRIN_MEDIATED_SIGNALING_PATHWAY                              | <0.001 | 2,03 | COL16A1, COL3A1, ITGA9, SYK, ITGB5, ADAM9, DST, PTPN11, ITGB1, NEDD9, ITGA6, ITGAV, PTK2B, ADAM10, DAB2, MYH9, PTK2, ITGA5, ITGB8, ITGA1, ADAM15, SEMA7A                                                                                                                                                                                                                                                                                                                                                                                                                |
| GO_POSITIVE_REGULATION_OF_EPITHELIAL_TO_MESENCHYMAL_TRANSITION      | <0.001 | 2,03 | COL1A1, TGFB2, TGFB3, WWTR1, BAMBI, SMAD4, DAB2, SNAI1, GCNT2, SDCBP, TGFB2, TWIST1, TGFB1, BMP2, OLFM1, GLIPR2                                                                                                                                                                                                                                                                                                                                                                                                                                                         |
| GO_SKELETAL_SYSTEM_DEVELOPMENT                                      | <0.001 | 2,03 | COL5A2, COL12A1, COL1A2, SPARC, COL1A1, TGFB2, VCAN, COL3A1, SULF1, POSTN, FRZB, TGFB3, MGP, PDGFRA, LUM, TBX15, TIMP1, TGFB1, PTPN11, PKD1, ANXA2, NRP3, FAM20C, MMP2, ZEB1, PRELP, CD44, IGF1, CREB3L2, GLG1, SFRP1, AKAP13, CMKLR1, PLS3, EXT1, ANO6, COMP, ARID5B, BMP1A, FREM1, EXT1, TRPS1, EIF2AK3, WDR19, RPS6KA3, TNFRSF11B, STC1, MMP14, IMPAD1, FGFR3, SNAI1, PTHLH, PIP4K2A, ACAN, MEFC2,                                                                                                                                                                   |

70 **Supplemental table 5A**

71 Top 25 of enriched GO biological processes of upregulated genes in HFD+ANGII versus CTRL. Padj = P Value adjusted for multiple testing. NES = normalized  
72 enrichment score.

73

74

75

| Pathway                                                               | padj   | NES   | leadEdge                                                                                                                                                                                                                                                                                                                                                                                                                                                                                                                                                                                                                                                                                                                                                                                                                                                                                                                                                                                                                                                                                                                                                                                                                                                                                                                        |
|-----------------------------------------------------------------------|--------|-------|---------------------------------------------------------------------------------------------------------------------------------------------------------------------------------------------------------------------------------------------------------------------------------------------------------------------------------------------------------------------------------------------------------------------------------------------------------------------------------------------------------------------------------------------------------------------------------------------------------------------------------------------------------------------------------------------------------------------------------------------------------------------------------------------------------------------------------------------------------------------------------------------------------------------------------------------------------------------------------------------------------------------------------------------------------------------------------------------------------------------------------------------------------------------------------------------------------------------------------------------------------------------------------------------------------------------------------|
| GO_OXIDATIVE_PHOSPHORYLATION                                          | 0,0030 | -3.49 | UQCRC1, COX4I1, COX7B, NDUFS6, NDUFB11, NDUFV1, NDUFA9, NDUFS1, NDUFA5, NDUFS7, CYC1, UQCRCQ, COX6G, NDUFB8, NDUFA13, COX7C, UQCRC11, SDHC, NDUFB10, NDUFA6, NDUFS2, NDUFB9, UQCRCF51, COX8C, NDUFS3, NDUFB6, NDUFA11, NDUFA12, DLD, UQCRC2, NDUFA8, NDUFB7, COX5B, TAZ, UQCRCR, UQCRCR, COX6B1, NDUFV2, SURF1, COQ9, NDUFS8, NDUFA7, NDUFA4, UQCRCB, NDUFB5, NDUFA2, UQCRC10, NDUFS4, NDUFV3, AK2, NDUFC1.                                                                                                                                                                                                                                                                                                                                                                                                                                                                                                                                                                                                                                                                                                                                                                                                                                                                                                                     |
| GO_CELLULAR_RESPIRATION                                               | 0,0030 | -3.48 | SDHA, IDH3B, SUCLG2, UQCRC1, COX4I1, PINK1, COX7B, FH, NDUFS6, ETFA, ETFB, ALDH5A1, NDUFB11, NDUFV1, NDUFA9, NDUFS1, NDUFA5, NDUFS7, CYC1, UQCRCQ, IDH2, COX6G, OXA1L, NDUFB8, NDUFA13, COX7C, UQCRC11, SDHC, NDUFB10, NDUFA6, NDUFS2, MDH1, NDUFB9, SDHB, UQCRCF51, COX8C, MDH2, NDUFS3, NDUFB6, IDH3G, CS, NDUFA1, NDUFA12, DLD, UQCRC2, NDUFA10, SDHD, NDUFA8, SUCLG1, NNT, ME3, NDUFB7, COX5B, TAZ, UQCRCR, UQCRCR, COX6B1, NDUFV2, SURF1, COQ9, SIRT3, NDUFS8, OGDH, NDUFA7, NDUFA4, UQCRCB, NDUFB5, NDUFA2, UQCRC10, NDUFS4, NDUFV3, NDUFC1, NDUFC2-KCTD14, NDUFC2, NDUFB2, NDUFA1, NDUFA11, NDUFA12, NDUFA10, AIFM1, NDUFA8, NDUFB7, TAZ, NDUFV2, NDUFS8, NDUFA7, UQCRCB, NDUFB5, NDUFA2, UQCRC10, NDUFS4, NDUFV3, NDUFC1, NDUFC2, NDUFB2, NDUFA1, NDUFA11, IMMPL1, NDUFA3, FOXRED1, NDUFB4, BCS1L, NDUFAF3, NDUFS5, NDUFAF4                                                                                                                                                                                                                                                                                                                                                                                                                                                                                             |
| GO_ELECTRON_TRANSPORT_CHAIN                                           | 0,0030 | -3.40 | SDHA, UQCRC1, COX4I1, PINK1, COX7B, NDUFS6, ETFA, ETFB, ALDH5A1, NDUFB11, NDUFV1, NDUFA9, NDUFS1, NDUFA5, NDUFS7, CYC1, UQCRCQ, COX6G, NDUFB8, NDUFA13, COX7C, UQCRC11, SDHC, NDUFB10, NDUFA6, NDUFS2, NDUFB9, SDHB, UQCRCF51, COX8C, MDH2, NDUFS3, NDUFB6, IDH3G, CS, NDUFA1, NDUFA12, DLD, UQCRC2, NDUFA10, SDHD, NDUFA8, SUCLG1, NNT, ME3, NDUFB7, COX5B, TAZ, GNMT, UQCRCR, UQCRCR, COX6B1, NDUFV2, SURF1, COQ9, SIRT3, NDUFS8, OGDH, NDUFA7, NDUFA4, UQCRCB, AKT2, NDUFB5, PPP1CA, NDUFA2, UQCRC10, NDUFS4, NDUFV3, NDUFC1, NDUFC2-KCTD14, NDUFC2, NDUFB2, NDUFA1, COX10, NDUFA11                                                                                                                                                                                                                                                                                                                                                                                                                                                                                                                                                                                                                                                                                                                                          |
| GO_ENERGY_DERIVATION_BY_OXIDATION_OF_ORGANIC_COMPOUNDS                | 0,0030 | -3.12 | SDHA, IDH3B, PFKM, SUCLG2, UQCRC1, COX4I1, PINK1, COX7B, AKT1, FH, NDUFS6, ETFA, ETFB, ALDH5A1, NDUFB11, NDUFV1, PYGM, NDUFA9, NDUFS1, NDUFA5, NDUFS7, CYC1, UQCRCQ, IDH2, COX6G, OXA1L, NDUFB8, NDUFA13, COX7C, UQCRC11, SDHC, NDUFB10, NDUFA6, NDUFS2, MDH1, NDUFB9, SDHB, UQCRCF51, COX8C, MDH2, NDUFS3, NDUFB6, IDH3G, CS, NDUFA1, NDUFA12, DLD, UQCRC2, NDUFA10, SDHD, NDUFA8, SUCLG1, NNT, ME3, NDUFB7, COX5B, TAZ, GNMT, UQCRCR, UQCRCR, COX6B1, NDUFV2, SURF1, COQ9, SIRT3, NDUFS8, OGDH, NDUFA7, NDUFA4, UQCRCB, AKT2, NDUFB5, PPP1CA, NDUFA2, UQCRC10, NDUFS4, NDUFV3, NDUFC1, NDUFC2-KCTD14, NDUFC2, NDUFB2, NDUFA1, NDUFA11, IMMPL1, NDUFA3, FOXRED1, NDUFB4, BCS1L, NDUFAF3, NDUFS5, NDUFAF4                                                                                                                                                                                                                                                                                                                                                                                                                                                                                                                                                                                                                       |
| GO_MITOCHONDRIAL_RESPIRATORY_CHAIN_COMPLEX_I_BIOGENESIS               | 0,0030 | -3.07 | NDUFS6, NDUFB11, NDUFV1, NDUFA9, NDUFS1, NDUFA5, NDUFS7, OXA1L, NDUFB8, NDUFA13, EC5IT, NDUFB10, NDUFA6, NDUFS2, NDUFB9, NDUFS3, NDUFB6, NDUFA1, NDUFA12, NDUFA10, AIFM1, NDUFA8, NDUFB7, TAZ, NDUFV2, NDUFS8, NDUFA7, UQCRCB, NDUFB5, NDUFA2, UQCRC10, NDUFS4, NDUFV3, NDUFC1, NDUFC2, NDUFB2, NDUFA1, NDUFA11, IMMPL1, NDUFA3, FOXRED1, NDUFB4, BCS1L, NDUFAF3, NDUFS5, NDUFAF4                                                                                                                                                                                                                                                                                                                                                                                                                                                                                                                                                                                                                                                                                                                                                                                                                                                                                                                                               |
| GO_MITOCHONDRIAL_RESPIRATORY_CHAIN_COMPLEX_ASSEMBLY                   | 0,0030 | -3.05 | NDUFS6, NDUFB11, NDUFV1, NDUFA9, NDUFS1, NDUFA5, SAMM50, NDUFS7, OXA1L, NDUFB8, NDUFA13, EC5IT, NDUFB10, NDUFA6, NDUFS2, NDUFB9, NDUFS3, NDUFB6, NDUFA1, NDUFA12, NDUFA10, AIFM1, NDUFA8, NDUFB7, TAZ, NDUFV2, NDUFS8, NDUFA7, UQCRCB, NDUFB5, NDUFA2, UQCRC10, NDUFS4, NDUFV3, NDUFC1, NDUFC2, NDUFB2, NDUFA1, NDUFA11, IMMPL1, NDUFA3, FOXRED1, NDUFB4, BCS1L, NDUFAF3, NDUFS5, IMMPL2L, SDHAF1, NDUFAF4                                                                                                                                                                                                                                                                                                                                                                                                                                                                                                                                                                                                                                                                                                                                                                                                                                                                                                                      |
| GO_GENERATION_OF_PRECURSOR_METABOLITES_AND_ENERGY                     | 0,0030 | -2.99 | ENO3, SDHA, IDH3B, PFKM, SUCLG2, UQCRC1, COX4I1, PINK1, COX7B, AKT1, SLC25A3, FH, NDUFS6, ETFA, ETFB, ALDH5A1, NDUFB11, NDUFV1, PYGM, NDUFA9, NDUFS1, NDUFA5, NDUFS7, CYC1, UQCRCQ, IDH2, PKFBF1, COX6G, OXA1L, NDUFB8, NDUFA13, COX7C, UQCRC11, SDHC, NDUFB10, NDUFA6, NDUFS2, MDH1, NDUFB9, SDHB, UQCRCF51, COX8C, MDH2, NDUFS3, NDUFB6, IDH3G, CS, NDUFA1, SLC25A4, NDUFA12, DLD, UQCRC2, NDUFA10, SDHD, NDUFA8, SUCLG1, NNT, ME3, NDUFB7, COX5B, TAZ, GNMT, UQCRCR, UQCRCR, COX6B1, NDUFV2, SURF1, COQ9, SIRT3, NDUFS8, OGDH, NDUFA7, NDUFA4, UQCRCB, AKT2, NDUFB5, PPP1CA, NDUFA2, ,                                                                                                                                                                                                                                                                                                                                                                                                                                                                                                                                                                                                                                                                                                                                       |
| GO_AEROBIC_RESPIRATION                                                | 0,0030 | -2.90 | SDHA, IDH3B, SUCLG2, UQCRC1, FH, NDUFV1, IDH2, OXA1L, SDHC, MDH1, SDHB, MDH2, IDH3G, CS, DLD, UQCRC2, SDHD, SUCLG1, NNT, ME3, UQCRCR, SURF1, SIRT3, OGDH, UQCRCB, UQCRC10, PDHA1, SUCLA2, MTFR1, COX10, ENO3, PFKM, UQCRC1, COX4I1, COX7B, NDUFS6, NDUFB11, NDUFV1, NDUFA9, NDUFS1, NDUFA5, NDUFS7, CYC1, UQCRCQ, PFKFB1, COX6G, NDUFB8, NDUFA13, COX7C, UQCRC11, SDHC, NDUFB10, NDUFA6, NDUFS2, ALDOB, NDUFB9, UQCRCF51, COX8C, NDUFS3, NDUFB6, NDUFA1, NDUFA12, DLD, UQCRC2, NDUFA10, ENTDP5, SUCLG1, NDUFB7, DGUOK, COX5B, TAZ, UQCRCR, UQCRCR, COX6B1, NDUFV2, SURF1, COQ9, NDUFS8, OGDH, NDUFA7, NDUFA4, UQCRCB, DUT, NDUFB5, NDUFA2, UQCRC10, NDUFS4, AK1, NDUFV3, AK2, NDUFC1, NDUFC2-KCTD14, NDUFC2, DCTPP1, NME6, NDUFB2, MYH6, NDUFA1, CHCHD10, NME4, COX10, NDUFA11, NFS1, MRPS15, MRPS35, MRPL39, MRPL42, MRPL44, MRPL45, HARS2, MRPS24, MRPS9, MRPL4, TUFM, MRPS28, MRPL28, MRPL38, MRPL51, MRPS11, MRPL41, MRPL18, GADD45GIP1, MRPL2, MRPL37, MRPS21, MRPL1, DAP3, MRPS31, MRPS30, MRPL30, MRPS26, MRPS7, AURKAIP1, MRPL24, MRPL23, CHCHD1, MRPL9, TSFM, MRPS12, MRPL12, MRPS16, MRPL11, MRPS18A, MRPS36, MRPL16, MRPS22, MRPL47, MRPS5, GATC, MRPL49, MRPL10, MRPL17, MRPS6, MRPL44, MRPL48, MRPS33, MRPS18C, MRPL21, MRPL27, MRPL50, MRPL46, QRSL1, MRPS14, MTFI2, EARS2, MRPL36, MRPS17, MRPL3, MRPL55, MRPS25 |
| GO_NUCLEOSIDE_TRIPHOSPHATE_METABOLIC_PROCESS                          | 0,0030 | -2.87 | ENO3, PFKM, UQCRC1, COX4I1, COX7B, NDUFS6, NDUFB11, NDUFV1, NDUFA9, NDUFS1, NDUFA5, NDUFS7, CYC1, UQCRCQ, PFKFB1, COX6G, NDUFB8, NDUFA13, COX7C, UQCRC11, SDHC, NDUFB10, NDUFA6, NDUFS2, ALDOB, NDUFB9, UQCRCF51, COX8C, NDUFS3, NDUFB6, NDUFA1, NDUFA12, DLD, UQCRC2, NDUFA10, ENTDP5, SUCLG1, NDUFB7, DGUOK, COX5B, TAZ, UQCRCR, UQCRCR, COX6B1, NDUFV2, SURF1, COQ9, NDUFS8, OGDH, NDUFA7, NDUFA4, UQCRCB, DUT, NDUFB5, NDUFA2, UQCRC10, GART, NDUFS4, AK1, NDUFV3, DHODH, AK2, NDUFC1, NDUFC2-KCTD14, NDUFC2, NDUFB2, MYH6, NDUFA1, CHCHD10, COX10, NDUFA11, MAGI3, GALK1, MSH2, LHPP, NDUFA3, PGAM2, FXN, PFAS                                                                                                                                                                                                                                                                                                                                                                                                                                                                                                                                                                                                                                                                                                             |
| GO_MITOCHONDRIAL_TRANSLATION                                          | 0,0030 | -2.84 | MRPS15, MRPS35, MRPL39, MRPL42, MRPL44, MRPL45, HARS2, MRPS24, MRPS9, MRPL4, TUFM, MRPS28, MRPL28, MRPL38, MRPL51, MRPS11, MRPL41, MRPL18, GADD45GIP1, MRPL2, MRPL37, MRPS21, MRPL1, DAP3, MRPS31, MRPS30, MRPL30, MRPS26, MRPS7, AURKAIP1, MRPL24, MRPL23, CHCHD1, MRPL9, TSFM, MRPS12, MRPL12, MRPS16, MRPL11, MRPS18A, MRPS36, MRPL16, MRPS22, MRPL47, MRPS5, GATC, MRPL49, MRPL10, MRPL17, MRPS6, MRPL44, MRPL48, MRPS33, MRPS18C, MRPL21, MRPL27, MRPL50, MRPL46, QRSL1, MRPS14, MTFI2, EARS2, MRPL36, MRPS17, MRPL3, MRPL55, MRPS25                                                                                                                                                                                                                                                                                                                                                                                                                                                                                                                                                                                                                                                                                                                                                                                       |
| GO_NUCLEOSIDE_MONOPHOSPHATE_METABOLIC_PROCESS                         | 0,0030 | -2.81 | ENO3, PFKM, UQCRC1, COX4I1, COX7B, NDUFS6, NDUFB11, NDUFV1, NDUFA9, NDUFS1, NDUFA5, NDUFS7, CYC1, UQCRCQ, PFKFB1, COX6G, NDUFB8, NDUFA13, COX7C, UQCRC11, SDHC, NDUFB10, NDUFA6, NDUFS2, ALDOB, NDUFB9, UQCRCF51, COX8C, NDUFS3, NDUFB6, NDUFA1, NDUFA12, DLD, UQCRC2, NDUFA10, ENTDP5, SUCLG1, NDUFB7, DGUOK, COX5B, TAZ, UQCRCR, UQCRCR, COX6B1, NDUFV2, SURF1, COQ9, NDUFS8, OGDH, NDUFA7, NDUFA4, UQCRCB, DUT, NDUFB5, NDUFA2, UQCRC10, GART, NDUFS4, AK1, NDUFV3, DHODH, AK2, NDUFC1, NDUFC2-KCTD14, NDUFC2, NDUFB2, MYH6, NDUFA1, CHCHD10, COX10, NDUFA11, MAGI3, GALK1, MSH2, LHPP, NDUFA3, PGAM2, FXN, PFAS                                                                                                                                                                                                                                                                                                                                                                                                                                                                                                                                                                                                                                                                                                             |
| GO_TRANSLATIONAL_ELONGATION                                           | 0,0030 | -2.78 | MRPS15, MRPS35, MRPL39, MRPL42, MRPL44, MRPL45, MRPS24, MRPS9, MRPL4, TUFM, MRPS28, MRPL28, RPL2, GTPBB1, EEF1D, MRPL38, MRPL51, MRPS11, MRPL41, MRPL18, GADD45GIP1, MRPL2, MRPL37, MRPS21, MRPL1, DAP3, TRNAU1AP, MRPS31, MRPS30, MRPL30, MRPS26, EEF2, MRPS7, GTPBP2, AURKAIP1, MRPL24, MRPL23, CHCHD1, MRPL9, TSFM, MRPS12, MRPL12, MRPS16, MRPL11, MRPS18A, MRPS36, MRPL16, MRPS22, MRPL47, MRPS5, MRPL49, MRPL10, SECISBP2, MRPL17, MRPS6, MRPL44, MRPL48, MRPS33, MRPS18C, MRPL21, MRPL27, MRPL50, MRPL46, RPLP1, MRPS14, EIF5A1, EIF5A, MRPL36, MRPS17, EEFSEC, MRPL3, APTB1, MRPL55, MRPS25                                                                                                                                                                                                                                                                                                                                                                                                                                                                                                                                                                                                                                                                                                                             |
| GO_TRICARBOXYLIC_ACID_METABOLIC_PROCESS                               | 0,0030 | -2.71 | SDHA, IDH3B, SUCLG2, FH, GHR, IDH2, SDHC, MDH1, SDHB, MDH2, IDH3G, CS, DLD, SDHD, SUCLG1, NNT, OGDH, PDHA1, SUCLA2, DLST, ACO2, IDH3A, DHTKD1, GLUD1                                                                                                                                                                                                                                                                                                                                                                                                                                                                                                                                                                                                                                                                                                                                                                                                                                                                                                                                                                                                                                                                                                                                                                            |
| GO_TRANSLATIONAL_TERMINATION                                          | 0,0030 | -2.67 | MRPS15, MRPS35, MRPL39, MRPL42, MRPL44, MRPL45, MRPS24, MRPS9, MRPL4, MRPS28, MRPL28, MRPL38, MRPL51, MRPS11, MRPL41, MRPL18, GADD45GIP1, MRPL2, MRPL37, MRPS21, MRPL1, DAP3, MRPS31, MRPS30, MRPL30, MRPS26, MRPS7, AURKAIP1, MRPL24, MRPL23, CHCHD1, MRPL9, MRPS12, MRPL12, MRPS16, MRPL11, MRPS18A, MRPS36, MRPL16, MRPS22, MRPL47, MRPS5, MRPL49, MRPL10, MRPL17, MRPS6, MRPL44, MRPL48, MRPS33, MRPS18C, MRPL21, MRPL27, MRPL50, MRPL46, MRPS14, MRPL36, MRPS17, MRPL3, MRPL55, MRPS25                                                                                                                                                                                                                                                                                                                                                                                                                                                                                                                                                                                                                                                                                                                                                                                                                                     |
| GO_BRANCHED_CHAIN_AMINO_ACID_METABOLIC_PROCESS                        | 0,0030 | -2.62 | ACADS8, MCCC1, BCKDHB, MCCC2, IVD, PPM1K, HSD17B10, GHR, ALDH6A1, HIBADH, BCAT2, AUH, DLD, BCKDHA, DBT, ACAD8, HMGCL, BCKDK                                                                                                                                                                                                                                                                                                                                                                                                                                                                                                                                                                                                                                                                                                                                                                                                                                                                                                                                                                                                                                                                                                                                                                                                     |
| GO_CELLULAR_AMINO_ACID_CATABOLIC_PROCESS                              | 0,0030 | -2.60 | GPT, ACADS8, GCDH, ALDH4A1, MCCC1, CARNS1, BCKDHB, MCCC2, IVD, PPM1K, ALDH5A1, HSD17B10, OAT, HNMT, ALDH6A1, HIBADH, BCAT2, AUH, ALDH11, DLD, GCAT, BCKDHA, SHMT1, DBT, ACAD8, OGDH, QDPR, GOT2, HMGCL, GSTZ1, GOT1, BCKDK, DLST, ASPA, FAH, THNSL2, GLUD2, GLUD1                                                                                                                                                                                                                                                                                                                                                                                                                                                                                                                                                                                                                                                                                                                                                                                                                                                                                                                                                                                                                                                               |
| GO_ORGANIC_ACID_CATABOLIC_PROCESS                                     | 0,0030 | -2.55 | GPT, ACADS8, GCDH, ALDH4A1, SORD, MCCC1, CARNS1, BCKDHB, MCCC2, ECHS1, PCCA, ETFA, PCCB, ETFB, IVD, PPM1K, ALDH5A1, HSD17B10, OAT, HNMT, ALDH6A1, HIBADH, EC1, BCAT2, AUH, MCEE, PHYH, ALDH11, DLD, GCAT, BCKDHA, ACAA1, SHMT1, DBT, ECH1, ACADM, ACAD8, DCXR, OGDH, ACSF3, QDPR, HADH, AMACR, HADHA, GOT2, HMGCL, ACADVL, HADHB, GSTZ1, CYP26B1, PEX2, GOT1, BCKDK, DLST, ASPA, FAH, NUDT19, THNSL2, ACADS, PEX7, GLUD2, GLUD1                                                                                                                                                                                                                                                                                                                                                                                                                                                                                                                                                                                                                                                                                                                                                                                                                                                                                                 |
| GO_GLYCOSYL_COMPOUND_METABOLIC_PROCESS                                | 0,0030 | -2.49 | ENO3, MACROD1, PFKM, MCCC2, UQCRC1, COX4I1, COX7B, NDUFS6, NDUFB11, NDUFV1, NDUFA9, NDUFS1, NDUFA5, NDUFS7, CYC1, UQCRCQ, PFKFB1, COX6G, NDUFB8, NDUFA13, COX7C, UQCRC11, SDHC, NDUFB10, NDUFA6, NDUFS2, ALDOB, NDUFB9, APOBEC2, UQCRCF51, COX8C, MCEE, NDUFS3, NDUFB6, NDUFA1, NDUFA12, DLD, UQCRC2, AKR1B1, NDUFA10, ENTDP5, NDUFA8, DCAKD, ATP1A2, NDUFB7, DGUOK, COX5B, TAZ, GNMT, UQCRCR, UQCRCR, COX6B1, NDUFV2, SURF1, COQ9, NDUFS8, OGDH, NDUFA7, NDUFA4, UQCRCB, DUT, NDUFB5, NDUFA2, UQCRC10, GART, NDUFS4, AK1, NDUFV3, DHODH, AK2, NDUFC1, NDUFC2-KCTD14, NDUFC2, NME6, NDUFB2, PANK4, MYH6, NDUFA1, CHCHD10, NME4, COX10, NDUFA11, AKR1B10, ACOT7, NFS1, MAGI3, GALK1, MSH2, ACACB, GAMT, NDUFA3, PGAM2, FXN                                                                                                                                                                                                                                                                                                                                                                                                                                                                                                                                                                                                       |
| O_MITOCHONDRION_ORGANIZATION                                          | 0,0030 | -2.45 | CAMK2A, RHOT2, PINK1, AKT1, NDUFS6, MRPS15, ADAMTS7, NDUFB11, NDUFV1, HSD17B10, RCL2L11, NDUFA9, NDUFS1, NDUFA5, MRPS35, SAMM50, SIVA1, NDUF57, MRPL39, OXA1L, NDUFB8, NDUFA13, EC5IT, NDUFB10, NDUFA6, NDUFS2, SLC22A3, MDH1, MRPL42, NDUFB9, MTFP1, MRPL14, RAB3A, MUL1, ACAA2, ASB2, ALKBH7, NDUFS3, NDUFB6, MRPL45, NDUFA1, SLC25A4, KCNK3, NDUFA12, HARS2, CHCHD3, NDUFA10, AIFM1, NDUFA8, PHB, MRPS24, NDUFB7, ESRRB, MRPS9, TAZ, MRPL4, NDUFV2, SIRT3, TUFM, NDUFS8, NDUFA7, TMEM70, UQCRCB, SNRBP, MRPS28, NDUFB5, YWHAE, NDUFA2, TOMM40, UQCRC10, NDUFS4, NDUFV3, PPIF, SOD2, TRMT5                                                                                                                                                                                                                                                                                                                                                                                                                                                                                                                                                                                                                                                                                                                                    |
| GO_ALPHA_AMINO_ACID_CATABOLIC_PROCESS                                 | 0,0030 | -2.41 | GPT, GCDH, ALDH4A1, MCCC1, CARNS1, MCCC2, IVD, OAT, HNMT, ALDH6A1, HIBADH, AUH, ALDH11, DLD, GCAT, SHMT1, ACAD8, OGDH, QDPR, GOT2, HMGCL, GSTZ1, GOT1, DLST, ASPA, FAH, THNSL2, GLUD2, GLUD1                                                                                                                                                                                                                                                                                                                                                                                                                                                                                                                                                                                                                                                                                                                                                                                                                                                                                                                                                                                                                                                                                                                                    |
| GO_PURINE_CONTAINING_COMPOUND_METABOLIC_PROCESS                       | 0,0030 | -2.39 | ENO3, GMPR, MACROD1, PFKM, MCCC2, UQCRC1, COX4I1, COX7B, NDUFS6, NDUFB11, NDUFV1, NDUFA9, NDUFS1, NDUFA5, NDUFS7, CYC1, UQCRCQ, PFKFB1, COX6G, NDUFB8, NDUFA13, COX7C, UQCRC11, SDHC, NDUFB10, NDUFA6, PDE4A, NDUFS2, ALDOB, NDUFB9, UQCRCF51, COX8C, MCEE, NDUFS3, NDUFB6, NDUFA1, NDUFA12, DLD, UQCRC2, SHMT1, NDUFA10, ENTDP5, NDUFA8, DCAKD, ATP1A2, NDUFB7, DGUOK, COX5B, TAZ, GNMT, UQCRCR, UQCRCR, COX6B1, NDUFV2, SURF1, COQ9, NDUFS8, OGDH, NDUFA7, NDUFA4, UQCRCB, NDUFB5, NDUFA2, UQCRC10, GART, NDUFS4, AK1, NDUFV3, AK2, NDUFC1, NDUFC2-KCTD14, NDUFC2, NME6, NDUFB2, ,                                                                                                                                                                                                                                                                                                                                                                                                                                                                                                                                                                                                                                                                                                                                            |
| GO_ESTABLISHMENT_OF_PROTEIN_LOCALIZATION_TO_ENDOPLASMIC_RETICULUM     | 0,0030 | -2.39 | RPL3L, RPS14, RPL8, RPS3, RPS9, RPS6, RPS23, RPS13, RPL38, RPL35A, RPS21, RPLP2, RPL36, RPS27, RPL11, RPL14, RPL18, RPLS17, RPS4X, RPL13, RPS15, RPL37A, RPL30, RPL23, RPS15A, RPL12, RPL34, RPL35, RPL36A, RPL28, RPL10A, RPL29, RPL19, RPL21, FAU, RPS24, RPS11, RPS16, RPS19, RPS5, SRP8B, SRP68, RPL39, RPLP1, RPL23A, RPL27                                                                                                                                                                                                                                                                                                                                                                                                                                                                                                                                                                                                                                                                                                                                                                                                                                                                                                                                                                                                |
| GO_NUCLEAR_TRANSCRIBED_MRNA_CATABOLIC_PROCESS_NONSENSE_MEDIATED_DECAY | 0,0030 | -2.36 | RPL3L, RPS14, RPL8, RPS3, RPS9, RPS6, RPS23, RPS13, RPL38, RPL35A, RPS21, RPLP2, RPL36, RPS27, RPL11, RPL14, RPL18, RPLS17, RPS4X, RPL13, RPS15, RPL37A, RPL30, RPL23, PPS21A, RPS15A, EXOSC10, RPL12, RPL34, RPL35, RPL36A, RPL28, RPL10A, RPL29, RPL19, CAS3, RPL21, FAU, RPS24, RPS11, UPF1, RPS16, SMG5, RPS19, RPS5, UPF3B                                                                                                                                                                                                                                                                                                                                                                                                                                                                                                                                                                                                                                                                                                                                                                                                                                                                                                                                                                                                 |
| GO_SMALL_MOLECULE_CATABOLIC_PROCESS                                   | 0,0030 | -2.35 | ENO3, GPT, ACADS8, GCDH, ALDH2, ALDH4A1, SORD, MCCC1, CARNS1, PFKM, BCKDHB, MCCC2, ECHS1, PCCA, ETFA, PCCB, ETFB, IVD, PPM1K, ALDH5A1, HSD17B10, ENPP2, OAT, HNMT, ALDH6A1, PFKFB1, HIBADH, EC1, ALDOB, BCAT2, AUH, INPP5E, OXCT1, NUDT3, MCEE, KHK, PHYH, ALDH11, DLD, GCAT, BCKDHA, ACAA1, SHMT1, DBT, ECH1, GALT, ACADM, ACAD8, DCXR, SCARF1, OGDH, ACSF3, QDPR, HADH, AMACR, HADHA, GOT2, HMGCL, PNKD, ACADVL, HADHB, GSTZ1, CYP26B1, AKR1B10, PEX2, GALK1, GOT1, PGAM2, BCKDK, DLST, ASPA, FAH, NUDT19, THNSL2, IMPA2, ADHS, ACADS, ALDH1B1, PEX7, GLUD2, GLUD1, INPP5K, DHODH, CRYL1, ABHD10                                                                                                                                                                                                                                                                                                                                                                                                                                                                                                                                                                                                                                                                                                                              |
| GO_MONOCARBOXYLIC_ACID_CATABOLIC_PROCESS                              | 0,0030 | -2.32 | ACADS8, GCDH, ALDH4A1, SORD, ECHS1, PCCA, ETFA, PCCB, ETFB, IVD, ALDH5A1, EC1, MCEE, PHYH, ACAA1, ECH1, ACADM, ACAD8, DCXR, HADH, AMACR, HADHA, GOT2, ACADVL, HADHB, CYP26B1, PEX2                                                                                                                                                                                                                                                                                                                                                                                                                                                                                                                                                                                                                                                                                                                                                                                                                                                                                                                                                                                                                                                                                                                                              |

77 Top 25 of enriched GO biological processes of downregulated genes in HFD+ANGII versus CTRL. Padj = P Value adjusted for multiple testing. NES= normalized  
 78 enrichment score.

| Pathway                                                 | padj     | NES      | leadEdge                                                                                                                                                                                                                                                                                                                                                                                                                                                                                                                                                                                                |
|---------------------------------------------------------|----------|----------|---------------------------------------------------------------------------------------------------------------------------------------------------------------------------------------------------------------------------------------------------------------------------------------------------------------------------------------------------------------------------------------------------------------------------------------------------------------------------------------------------------------------------------------------------------------------------------------------------------|
| KEGG_ECM_RECEPTOR_INTERACTION                           | 0,00175  | 2,455631 | COL6A3, COL5A2, COL1A2, COL4A1, COL4A2, COL1A1, COL5A1, COL6A2, COL3A1, LAMC1, THBS4, TNC, COL6A1, SDC2, ITGA9, ITGB5, COL4A4, FN1, LAMA2, CD44, ITGB1, SPP1, ITGA6, ITGAV, LAMB1, COMP, HMMR, HSPG2, LAMA3, ITGA5, THBS1, ITGB8                                                                                                                                                                                                                                                                                                                                                                        |
| KEGG_FOCAL_ADHESION                                     | 0,00175  | 2,352287 | COL6A3, COL5A2, COL1A2, COL4A1, COL4A2, COL1A1, COL5A1, COL6A2, FLNC, COL3A1, LAMC1, THBS4, TNC, COL6A1, ITGA9, ACTN1, PDGFRA, PIK3R3, ITGB5, MYL12A, AKT3, ROCK2, COL4A4, FN1, LAMA2, IGF1, ITGB1, IGF1R, SPP1, TLN1, ITGA6, ITGAV, LAMB1, CAPN2, PPP1R12A, PDPK1, COMP, BCL2, ACTN4, FLNA, MET, GSK3B, CRK, RAGAP1, LAMA3, FLNB, PTEN, ARHGAP5, SOS1, PTK2, PRKCA, KDR, ITGA5, THBS1, ITGB8, ITGA1, ARHGAP35, PDGFC, PIK3CA, PAK6, FYN, MYLK2, EGFR, LAMC2, PIK3R5, PRKCB                                                                                                                             |
| KEGG_TGF_BETA_SIGNALING_PATHWAY                         | 0,00175  | 2,116799 | TGFB2, THBS4, TGFβ3, GDF6, TGFβR1, ROCK2, SMURF2, DCN, COMP, BMPRIA, INHBB, INHBA, SMAD4, THBS1, PPP2CA, BMPR2, SP1, ACVR1, RPS6KB1, ID2, FST, EP300, TGFB2, TGFβ1, BMP2, RHOA, TFDP1, ROCK1, THBS3, SMAD7, RBL1, CDKN2B, MYC, ACVR2B, ACVR2A, SMAD5                                                                                                                                                                                                                                                                                                                                                    |
| KEGG_REGULATION_OF_ACTIN_CYTOSKELETON                   | 0,00175  | 1,971689 | ENAH, MYH10, MSN, ARHGEF12, ITGA9, ACTN1, PDGFRA, PIK3R3, NCKAP1, ITGB5, MYL12A, ROCK2, FN1, IQGAP1, ITGB1, F2R, APC, ITGA6, ITGAV, PPP1R12A, ACTN4, RRAS2, DIAPH2, CRK, PIKFYVE, NRAS, FGFR3, SOS1, MYH9, PTK2, PIP4K2A, ITGA5, IQGAP3, ITGB8, FGD3, SSH2, ARPC2, CYFIP1, ARPC5L, FGFR1, FGF2, ITGA1, ARPC1B, ARHGAP35, ARHGEF6, PDGFC, PIK3CA, GNAI3, PAK6, GNG12, MYLK2, CFL2, LIMK1, EGFR, PIK3R5, NCKAP1L, CDC42, RRAS, CD14, DIAPH3, DOCK1, RHOA, TIAM2, PIK3CG, ROCK1, FGF6, ARPC5, CFL1, VAV1, PIK3CB, ARHGEF7, VAV3, PAK1, PAK3, F2, PDGFRB, PFN2, MAP2K1, DIAPH1, PAK2, ARPC4, ARHGEF4, FGFR2 |
| KEGG_ADHERENS_JUNCTION                                  | 0,002724 | 1,856705 | ACTN1, TGFβR1, IQGAP1, IGF1R, ACTN4, MET, PTPRF, PTPRJ, SMAD4, SNAI1, SORBS1, MAP3K7, FGFR1, FYN, PTPRB, EP300, EGFR, TGFB2, TJP1, CDC42, CTNND1, RHOA, YES1                                                                                                                                                                                                                                                                                                                                                                                                                                            |
| KEGG_NATURAL_KILLER_CELL_MEDIATED_CYTOTOXICITY          | 0,002724 | 1,7938   | SYK, PIK3R3, PTPN11, IFNGR1, PTK2B, NRAS, ULBP2, RAET1L, RAET1G, ULBP1, ULBP3, SOS1, PRKCA, LCP2, TNFRSF10C, TNFRSF10D, TNFRSF10B, PIK3CA, NFAT5, FYN, PIK3R5, PRKCB, TNFSF10, PIK3CG, VAV1, PIK3CB, VAV3, PAK1, SH3BP2, NFATC3, TYROBP, PTPN6, MAP2K1, NFATC2, KRAS, CD48, SOS2                                                                                                                                                                                                                                                                                                                        |
| KEGG_PATHOGENIC_ESCHERICHIA_COLI_INFECTION              | 0,005828 | 1,789319 | TLR4, ROCK2, ITGB1, TUBB6, CTTN, TUBB3, TUBA1A, PRKCA, TUBB, TUBA1C, ARHGEF2, TUBB2A, ARPC2, ARPC5L, ARPC1B, FYN, HCLS1, CDC42, CD14, NCL, RHOA, ROCK1, ARPC5, TUBB4A, YWHAQ, ARPC4, TUBB4B                                                                                                                                                                                                                                                                                                                                                                                                             |
| KEGG_N_GLYCAN_BIOSYNTHESIS                              | 0,007785 | 1,786919 | MGAT5B, ALG10B, ALG10, MAN1A2, ALG14, STT3A, MGAT5, MGAT4A, STT3B, MGAT2, MAN1A1, MAN2A1                                                                                                                                                                                                                                                                                                                                                                                                                                                                                                                |
| KEGG_FC_GAMMA_R_MEDIATED_PHAGOCYTOSIS                   | 0,002724 | 1,74136  | SYK, PLA2G4A, PIK3R3, AKT3, GAB2, ASAP2, ASAP1, CRK, SPHK1, PIKFYVE, DNMI1, PRKCA, PLD1, ARPC2, ARPC5L, ARPC1B, PIK3CA, RPS6KB1, CFL2, LIMK1, PIK3R5, PRKCB, CDC42, INPP5D, ARF6, PRKCD, DNMI1, PIK3CG, PTPRC, ARPC5, CFL1, VAV1, PIK3CB, VAV3, PAK1, FCGR1A                                                                                                                                                                                                                                                                                                                                            |
| KEGG_PROSTATE_CANCER                                    | 0,006622 | 1,692087 | PDGFRA, PIK3R3, AKT3, IGF1, IGF1R, CREB5, MTOR, CREB3L2, PDPK1, BCL2, E2F3, GSK3B, NRAS, PTEN, SOS1, CREB3, RB1, FGFR1, PDGFC, PIK3CA, IKBKG, HSP90AA1, EP300, EGFR, PIK3R5, E2F1                                                                                                                                                                                                                                                                                                                                                                                                                       |
| KEGG_DORSO_VENTRAL_AXIS_FORMATION                       | 0,04558  | 1,685633 | SPIRE1, ETV6, SOS1, CPEB1, NOTCH2, EGFR, ETS1, MAP2K1, KRAS, SOS2                                                                                                                                                                                                                                                                                                                                                                                                                                                                                                                                       |
| KEGG_ENDOCYTOSIS                                        | 0,00175  | 1,666435 | RAB31, PDGFRA, CBL, GRK5, CLTC, F2R, IGF1R, EHD4, HSPA1L, SMURF2, ASAP2, EPS15, MET, ARFGAP3, ITCH, ASAP1, EEA1, CCR5, PIKFYVE, DNMI1, DAB2, RABEP1, FGFR3, VPS4B, CHMP3, KDR, PLD1, ACAP2, CLTB, SMAPB1, AP2B1, CHMP5, EGFR, CBLB, TFR3, CDC42, ARF6, ARRB1, MDM2, USP8, RAB11FIP3, ARAP1, RAB11FIP5, DNMI1, CSF1R                                                                                                                                                                                                                                                                                     |
| KEGG_PATHWAYS_IN_CANCER                                 | 0,00175  | 1,622301 | COL4A1, COL4A2, TGFβ2, LAMC1, TGFβ3, PDGFRA, PIK3R3, TGFβR1, CBL, AKT3, FZD1, COL4A4, FN1, LAMA2, MMP2, IGF1, ITGB1, IGF1R, APC, MTOR, ITGA6, ITGAV, TRAF3, LAMB1, STK4, BCL2, MET, E2F3, DAPK2, GSK3B, CRK, NRAS, LAMA3, SMAD4, PTEN, FGFR3, SOS1, PTK2, FZD4, PRKCA, WNT9B, PLD1, HIF1A, FZD2, PTC1, RB1, FGFR1, FGF2, RUNX1, PIK3CA, IKBKG, TPR, HSP90AA1, IL6, EGN3, EP300, EGFR, FZD7, ARNT, RAD51, WNT9A, LAMC2, PIK3R5, E2F1, CBLB, PRKCB, GIL3, TGFB2, CDC42, APPL1, MDM2, TGFβ1, BMP2, KITLG, RHOA, STK36, SPI1, CCND1, CSF1R, LAMA4, BIRC5, PIK3CG, FGF6, CASP8, PTGS2, ETS1, CDKN2B          |
| KEGG_LEUKOCYTE_TRANSENDOHELIAL_MIGRATION                | 0,007785 | 1,616086 | MSN, ACTN1, PIK3R3, PTPN11, MYL12A, ROCK2, MMP2, ITGB1, PTK2B, ACTN4, ARHGAP5, PTK2, PRKCA, ARHGAP35, PIK3CA, GNAI3, PIK3R5, PRKCB, CDC42, RAP1B, THY1, CLDN15, CTNND1, CLDN23, RHOA, CYBB, PIK3CG, ROCK1, PECAM1, VAV1, PIK3CB, VAV3                                                                                                                                                                                                                                                                                                                                                                   |
| KEGG_GLYCOSAMINOGLYCAN_BIOSYNTHESIS_CHONDROITIN_SULFATE | 0,074749 | 1,593241 | CHPF, CSGALNACT2, DSE, XYLT1, CHSY1, CHPF2, CHST3, CHST11, CHST14, CHST15, CSGALNACT1, CHSY3                                                                                                                                                                                                                                                                                                                                                                                                                                                                                                            |
| KEGG_CHRONIC_MYELOID_LEUKEMIA                           | 0,026755 | 1,580176 | TGFB2, TGFβ3, PIK3R3, TGFβR1, PTPN11, CBL, AKT3, GAB2, E2F3, CRK, NRAS, SMAD4, SOS1, RB1, RUNX1, PIK3CA, IKBKG, PIK3R5, E2F1, CBLB, TGFB2, MDM2, TGFβ1, CCND1, PIK3CG, PIK3CB, MYC, MECOM, MAP2K1, CDK6, NFKB1, CRKL, KRAS, SOS2                                                                                                                                                                                                                                                                                                                                                                        |
| KEGG_PHOSPHATIDYLINOSITOL_SIGNALING_SYSTEM              | 0,027644 | 1,56528  | PIK3R3, INPP5J, PLCB4, INPP4B, PIKFYVE, PTEN, PLCB1, PLCE1, PRKCA, PIP4K2A, DGKD, PIK3CA, ITPR1, PIK3R5, PRKCB, INPP5D, CALM1, ITPR2, PI4KA, INPP1, DGKH, INPP5B, PIK3CG, CALM2, PIK3CA, PIK3CB, INPP4A, ITPK1, CDIPT, IPPK, SYNJ1                                                                                                                                                                                                                                                                                                                                                                      |
| KEGG_TOLL_LIKE_RECEPTOR_SIGNALING_PATHWAY               | 0,022818 | 1,563511 | TLR4, PIK3R3, AKT3, SPP1, TRAF3, LBP, MAP2K3, CTSK, RIPK1, CD80, TLR8, MAP3K7, TLR2, PIK3CA, IKBKG, IL6, PIK3R5, TLR7, TBK1, CD14, CD40, TLR1, IRAK4, MAP3K8, PIK3CG, CASP8, PIK3CB, CXCL9, IKBKE, TLR3, MAP2K1, TRAF6, NFKB1, CD86                                                                                                                                                                                                                                                                                                                                                                     |
| KEGG_SMALL_CELL_LUNG_CANCER                             | 0,025809 | 1,55903  | COL4A1, COL4A2, LAMC1, PIK3R3, AKT3, COL4A4, FN1, LAMA2, ITGB1, ITGA6, ITGAV, TRAF3, LAMB1, BCL2, E2F3, LAMA3, PTEN, PTK2, RB1, PIK3CA, IKBKG, LAMC2, PIK3R5, E2F1                                                                                                                                                                                                                                                                                                                                                                                                                                      |
| KEGG_AMINOACYL_TRNA_BIOSYNTHESIS                        | 0,055456 | 1,553188 | NARS, GARS, EPRS, IARS, LARS, AARS, SARS, MARS, TARS, CARS, YARS                                                                                                                                                                                                                                                                                                                                                                                                                                                                                                                                        |
| KEGG_LONG_TERM_DEPRESSION                               | 0,047663 | 1,536031 | GNAO1, PLA2G4A, IGF1, PRKG1, IGF1R, GRIA3, PLCB4, NRAS, PLCB1, PRKCA, PPP2CA, GNAI3, GNAI3, ITPR1, PRKCB, ITPR2                                                                                                                                                                                                                                                                                                                                                                                                                                                                                         |
| KEGG_CELL_ADHESION_MOLECULES_CAMS                       | 0,036473 | 1,513535 | VCAN, SDC2, ITGA9, ITGB1, CD34, ITGA6, GLG1, ITGAV, PTPRF, CD80, ITGB8, CDH4, CLDN15, CD40, CLDN23, SDC3, NFASC, SDC1, CADM3, PTPRC, PECAM1, ALCAM                                                                                                                                                                                                                                                                                                                                                                                                                                                      |
| KEGG_GAP_JUNCTION                                       | 0,042086 | 1,503137 | ADCY7, PDGFRA, LPAR1, PRKG1, TUBB6, PLCB4, NRAS, TUBB3, CDK1, TUBA1A, SOS1, PLCB1, PRKCA, TUBB, TUBA1C, TUBB2A, DRD1, PDGFC, GNAI3, EGFR, ITPR1, PRKCB, TJP1, ITPR2                                                                                                                                                                                                                                                                                                                                                                                                                                     |
| KEGG_HYPERTROPHIC_CARDIOMYOPATHY_HCM                    | 0,056371 | 1,472137 | TGFB2, ACE, TGFβ3, ITGA9, DMD, ITGB5, DES, LAMA2, IGF1, ITGB1, PRKAB2, ITGA6, ITGAV, TPM4, ITGA5, LMNA, ITGB8, ITGA1, SGCD, IL6, PRKAA1, SLC8A1, PRKAG3, CACNB3, TGFβ1, CACNA2D1, PRKAA2                                                                                                                                                                                                                                                                                                                                                                                                                |
| KEGG_PANCREATIC_CANCER                                  | 0,096156 | 1,414621 | TGFB2, TGFβ3, PIK3R3, TGFβR1, AKT3, E2F3, SMAD4, PLD1, RB1, ARHGEF6, PIK3CA, IKBKG, EGFR, RAD51, PIK3R5, E2F1, TGFB2, CDC42                                                                                                                                                                                                                                                                                                                                                                                                                                                                             |

79 Supplemental table 5C.

80 Top 25 of enriched KEGG cellular processes of upregulated genes in HFD+ANGII versus CTRL. Padj = P Value adjusted for multiple testing. NES= normalized  
 81 enrichment score.



| pathway                                           | padj     | NES      | leadEdge                                                                                                                                                                                                                                                                                                                                                                                                                                                                                                                                                   |
|---------------------------------------------------|----------|----------|------------------------------------------------------------------------------------------------------------------------------------------------------------------------------------------------------------------------------------------------------------------------------------------------------------------------------------------------------------------------------------------------------------------------------------------------------------------------------------------------------------------------------------------------------------|
| KEGG_PARKINSONS_DISEASE                           | 0,00175  | -3,23364 | SDHA, UQCRC1, COX4I1, PINK1, COX7B, NDUFS6, NDUFV1, NDUFA9, NDUFS1, NDUFA5, NDUFS7, CYC1, UQCRCQ, COX6C, NDUFB8, COX7C, UQCRC1, SDHC, NDUFB10, NDUFA6, NDUFS2, COX7A1, NDUFB9, SDHB, UQCRFS1, COX8C, NDUFS3, NDUFB6, COX6A2, NDUFA1, SLC25A4, UQCRC2, NDUFA10, SDHD, VDAC1, NDUFA8, NDUFB7, COX5B, UQCRHL, UQCRH, COX6B1, NDUFV2, NDUFS8, NDUFA7, NDUFA4, UQCRB, NDUFB5, NDUFA2, NDUFAZ, UQCRC10, NDUFS4, NDUFV3, COX7A2, NDUFC1, NDUFC2, NDUFB2, NDUFAB1, HTRAZ, VDAC2, NDUFA3, COX6B2                                                                    |
| KEGG_OXIDATIVE_PHOSPHORYLATION                    | 0,00175  | -3,08635 | SDHA, UQCRC1, COX4I1, COX7B, NDUFS6, NDUFV1, NDUFA9, NDUFS1, NDUFA5, NDUFS7, CYC1, UQCRCQ, COX6C, NDUFB8, COX7C, UQCRC1, SDHC, NDUFB10, NDUFA6, NDUFS2, COX7A1, NDUFB9, SDHB, PPA2, UQCRFS1, COX8C, NDUFS3, NDUFB6, COX6A2, NDUFA1, UQCRC2, NDUFA10, SDHD, NDUFA8, NDUFB7, COX5B, UQCRHL, UQCRH, COX6B1, NDUFV2, NDUFS8, NDUFA7, NDUFA4, UQCRB, NDUFB5, NDUFA2, UQCRC10, NDUFS4, NDUFV3, COX7A2, NDUFC1, NDUFC2, NDUFB2, NDUFAB1, ATP6V1F, COX10, NDUFA11, LHPP, NDUFA3, COX6B2                                                                            |
| KEGG_ALZHEIMERS_DISEASE                           | 0,00175  | -2,8459  | SDHA, UQCRC1, COX4I1, COX7B, NDUFS6, ATP2A2, CACNA1S, LPL, NDUFV1, HSD17B10, NDUFA9, NDUFS1, NDUFA5, NDUFS7, CYC1, UQCRCQ, COX6C, NDUFB8, COX7C, UQCRC1, SDHC, NDUFB10, NDUFA6, NDUFS2, COX7A1, NDUFB9, SDHB, UQCRFS1, COX8C, NDUFS3, NDUFB6, COX6A2, NDUFA1, UQCRC2, NDUFA10, SDHD, NDUFA8, NDUFB7, COX5B, UQCRHL, UQCRH, COX6B1, NDUFV2, NDUFS8, NDUFA7, NDUFA4, UQCRB, NDUFB5, NDUFA2, UQCRC10, NDUFS4, NDUFV3, COX7A2, NDUFC1, NDUFC2, NDUFB2, NDUFAB1                                                                                                 |
| KEGG_CARDIAC_MUSCLE_CONTRACTION                   | 0,00175  | -2,82662 | TNNT2, UQCRC1, COX4I1, COX7B, ATP2A2, MYL2, CACNA1S, MYL3, CYC1, UQCRCQ, COX6C, COX7C, UQCRC1, COX7A1, UQCRFS1, COX8C, COX6A2, UQCRC2, ATP1A2, COX5B, UQCRHL, UQCRH, COX6B1, UQCRB, UQCRC10, COX7A2, MYH6, TPM1, CACNB2, COX6B2, CACNB1, CACNG6, ATP1B2                                                                                                                                                                                                                                                                                                    |
| KEGG_VALINE_LEUCINE_AND_Isoleucine_DEGRADATION    | 0,00175  | -2,82063 | ACADSB, ALDH2, MCCC1, BCKDHB, MCCC2, ECHS1, PCCA, PCCB, IVD, HSD17B10, ALDH6A1, HIBADH, BCAT2, AUH, OXCT1, ACAA2, MCEE, DLD, BCKDHA, ACAA1, DBT, ACADM, ACAD8, ALDH9A1, HADH, HADHA, HMGCL, HADHB                                                                                                                                                                                                                                                                                                                                                          |
| KEGG_RIBOSOME                                     | 0,00175  | -2,75329 | RPL3L, RPL8, RPS3, RPS9, RPS6, RPS23, RPS13, RPL38, RPL35A, RPS21, RPLP2, RPL36, RPS27, RPL11, RPL14, RPL18, RPS17, RPS4X, RPL13, RPS15, RPL37A, RPL30, RPL23, RPS15A, RPL12, RPL34, RPL35, RPL36A, RPL28, RPL10A, RPL29, RPL19, RPL21, FAU, RPS24, RPS11, RPS16, RPS19, RPS5, RPL22L1, RPL39, RPLP1, RPL23A, RPL27                                                                                                                                                                                                                                        |
| KEGG_HUNTINGTONS_DISEASE                          | 0,00175  | -2,74057 | SDHA, UQCRC1, COX4I1, COX7B, NDUFS6, NDUFV1, NDUFA9, NDUFS1, NDUFA5, NDUFS7, CYC1, UQCRCQ, COX6C, NDUFB8, COX7C, UQCRC1, SDHC, NDUFB10, NDUFA6, NDUFS2, COX7A1, NDUFB9, SDHB, UQCRFS1, COX8C, NDUFS3, NDUFB6, COX6A2, NDUFA1, SLC25A4, UQCRC2, NDUFA10, SDHD, VDAC1, NDUFA8, NDUFB7, COX5B, UQCRHL, UQCRH, COX6B1, NDUFV2, NDUFS8, NDUFA7, NDUFA4, UQCRB, NDUFB5, NDUFA2, UQCRC10, TAF4, NDUFS4, NDUFV3, SOD2, COX7A2, NDUFC1, NDUFC2, NDUFB2, NDUFAB1, POLR2E, POLR2C, SOD1, VDAC2, NDUFA3, COX6B2, POLR2F, NDUFB4, PPARGC1A, VDAC3, HDAC2, POLR2I, AP251 |
| KEGG_CITRATE_CYCLE_TCA_CYCLE                      | 0,00175  | -2,73007 | SDHA, IDH3B, SUCLG2, FH, IDH2, SDHC, MDH1, SDHB, MDH2, IDH3G, CS, DLD, SDHD, SUCLG1, OGDH, PDHA1, SUCLA2, DLST, ACO2, IDH3A, PC                                                                                                                                                                                                                                                                                                                                                                                                                            |
| KEGG_PROPANOATE_METABOLISM                        | 0,00175  | -2,48861 | ALDH2, LDHB, SUCLG2, ECHS1, PCCA, PCCB, ALDH6A1, MCEE, SUCLG1, ACADM, ACSS1, ALDH9A1, HADHA, SUCLA2, ACACB, ALDH1B1, MLYCD, EHHADH, ACSS3, ACAT2                                                                                                                                                                                                                                                                                                                                                                                                           |
| KEGG_BUTANOATE_METABOLISM                         | 0,00175  | -2,18783 | ALDH2, ECHS1, ALDH5A1, L2HGDI, OXCT1, ALDH9A1, HADH, HADHA, HMGCL, PDHA1, AKR1B10, ACSM5, ACADS, ALDH1B1, EHHADH, ACAT2                                                                                                                                                                                                                                                                                                                                                                                                                                    |
| KEGG_FATTY_ACID_METABOLISM                        | 0,00175  | -2,17514 | ACADSB, GCDH, ALDH2, ECHS1, ECI1, ACAA2, ACAA1, ACADM, ALDH9A1, HADH, HADHA, ACADVL, HADHB, ADH5, ACSL6, ACADS, ALDH1B1, ADH1B, ADH1A, ADH1C, EHHADH, ACAT2, ECI2                                                                                                                                                                                                                                                                                                                                                                                          |
| KEGG_PYRUVATE_METABOLISM                          | 0,00175  | -2,13167 | ALDH2, LDHB, LDHD, MDH1, MDH2, DLD, AKR1B1, ME3, ACSS1, ALDH9A1, PDHA1, ACACB, PC, ALDH1B1, ACYP2                                                                                                                                                                                                                                                                                                                                                                                                                                                          |
| KEGG_DRUG_METABOLISM_CYTOCHROME_P450              | 0,002775 | -2,02132 | GSTK1, MAOB, GSTP1, GSTM2, CYP2D6, GSTZ1, GSTM3, MGST3, GSTA5, FMO1, ADH5, ADH1B, ADH1A, ADH1C, GSTT2, GSTO2, FMO2, GSTM4                                                                                                                                                                                                                                                                                                                                                                                                                                  |
| KEGG_BETA_ALANINE_METABOLISM                      | 0,006874 | -1,90986 | ALDH2, ECHS1, ACADM, ALDH9A1, HADHA, ALDH1B1, DPYD, MLYCD, EHHADH, UPB1                                                                                                                                                                                                                                                                                                                                                                                                                                                                                    |
| KEGG_PEROXISOME                                   | 0,00175  | -1,90387 | GSTK1, PRDX5, IDH2, PHYH, PMVK, ACAA1, ECH1, PXMP2, PEX6, DHRS4, SOD2, AMACR, HMGCL, SOD1, PXMP4, PEX2, GNPAT, NUDT19, ACSL6, PEX7, PEX5, MLYCD, CRAT, EHHADH, PRDX1, ECI2, PIPOX                                                                                                                                                                                                                                                                                                                                                                          |
| KEGG_METABOLISM_OF_XENOBIOTICS_BY_CYTOCHROME_P450 | 0,005138 | -1,87385 | GSTK1, GSTP1, GSTM2, GSTZ1, GSTM3, MGST3, GSTA5, ADH5, ADH1B, ADH1A, ADH1C, GSTT2, DHDH                                                                                                                                                                                                                                                                                                                                                                                                                                                                    |
| KEGG_GLYCOLYSIS_GLUONEOGENESIS                    | 0,007758 | -1,84159 | ENO3, ALDH2, LDHB, PFKM, ALDOB, DLD, ACSS1, ALDH9A1, FBP2, PDHA1, PGAM2, ADH5, ALDH1B1, ADH1B, ADH1A, ADH1C, GALM                                                                                                                                                                                                                                                                                                                                                                                                                                          |
| KEGG_TRYPTOPHAN_METABOLISM                        | 0,014614 | -1,76949 | GCDH, ALDH2, MAOB, ECHS1, INMT, OGDH, ALDH9A1, HADH, HADHA                                                                                                                                                                                                                                                                                                                                                                                                                                                                                                 |
| KEGG_SPLICEOSOME                                  | 0,002775 | -1,76178 | PPI1L, RBMX, SNRPB, PRPF40B, PRPF19, DDX5, BCAS2, SRSF2, NAA38, SF3B2, SNRNP70, HSPA2, SRSF5, DDX39B, ACIN1, TRA2A, CHERP, SF3A2, SART1, HSPA1A, HSPA1B, SRSF3, NCBP2, THOC3, PUF60, TXNL4A, SF3B5, LSM3, SRSF6, DDX23, SYF2, CDC40, HNRNP1A1, SNRPC, SRSF4, SNRPD3, HNRNPM, SRSF7, MAGOHB, SNRNP27, U2AF2, SF3A1, PIRG1, RBM22, LSM7, PCBP1, MAGOH, SRSF1, HNRNPU, PQBP1, CCDC12, PRPF31, SNW1, SNRNP40, XAB2, DHX16, ISY1, TRA2B, LSM6, CWC15, SNRPA1, SNRPF, LSM2                                                                                       |
| KEGG_LYSINE_DEGRADATION                           | 0,014614 | -1,75798 | GCDH, ALDH2, ECHS1, OGDH, ALDH9A1, HADH, HADHA, DLST, DOT1L, ALDH1B1, AASDH, EHHADH, AASDH, SETD1B, ACAT2, PIPOX, EHM2                                                                                                                                                                                                                                                                                                                                                                                                                                     |
| KEGG_ALANINE ASPARTATE AND GLUTAMATE METABOLISM   | 0,026117 | -1,72474 | GPT, ALDH4A1, ALDH5A1, ACY3, GOT2, NIT2, GOT1, ASPA, GLUD2, GLUD1, GPT2, AD5L                                                                                                                                                                                                                                                                                                                                                                                                                                                                              |
| KEGG_HISTIDINE_METABOLISM                         | 0,024828 | -1,7212  | ALDH2, MAOB, HNMT, ACY3, ALDH9A1, ASPA, HEMK1, ALDH1B1, DDC, LCM2                                                                                                                                                                                                                                                                                                                                                                                                                                                                                          |
| KEGG_ARGININE_AND_PROLINE_METABOLISM              | 0,035521 | -1,64213 | ALDH2, ALDH4A1, MAOB, CKM, OAT, ACY1, ALDH9A1, GOT2, CKMT2, GAMT, GOT1, ALDH1B1, GLUD2, GLUD1                                                                                                                                                                                                                                                                                                                                                                                                                                                              |
| KEGG_CYSSTEINE_AND_METHIONINE_METABOLISM          | 0,062935 | -1,58533 | ADI1, LDHB, MPST, GOT2, GOT1, MAT2B, APIP                                                                                                                                                                                                                                                                                                                                                                                                                                                                                                                  |
| KEGG_FRUCTOSE_AND_MANNANOSE_METABOLISM            | 0,092066 | -1,52163 | SORD, PFKM, PFKFB1, ALDOB, KHK, AKR1B1, FBP2, AKR1B10, GMPPA, MPI                                                                                                                                                                                                                                                                                                                                                                                                                                                                                          |

82

## 83 Supplemental table 5D

84 Top 25 of enriched KEGG cellular processes of downregulated genes in HFD+ANGII versus CTRL. Padj = P Value adjusted for multiple testing. NES= normalized  
85 enrichment score.

86

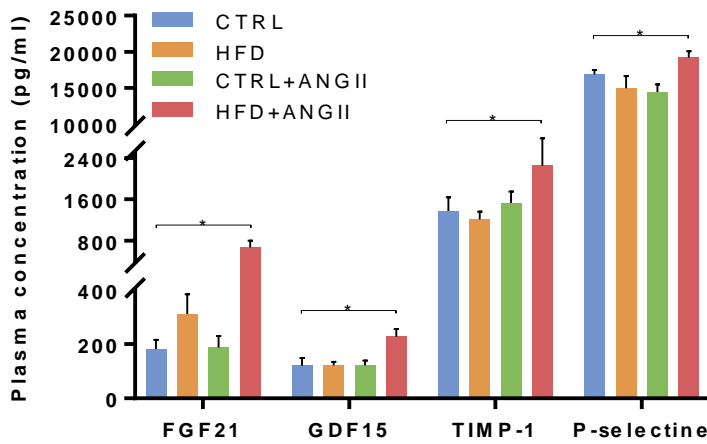

87  
 88 **Supplemental figure 1. Plasma concentrations determined with Luminex.**  
 89 Fibroblast growth factor 21 (FGF-21), Growth differentiation factor 15 (GDF-15), Tissue inhibitor metalloprotease-1  
 90 (TIMP-1), P-selectine.  
 91 CTRL = control diet. HFD = high fat diet. CTRL+ANGII = Angiotensin-II treated group on control chow. HFD+ANGII =  
 92 Angiotensin-II treated group on high fat diet. Data are presented as means. Error bars represent standard error of  
 93 the mean. Statistical testing was performed with Kruskal Wallis test followed by Mann-Witney-U.

94  
 95  
 96  
 97  
 98  
 99  
 100  
 101  
 102  
 103  
 104  
 105  
 106  
 107  
 108  
 109  
 110  
 111

**A**

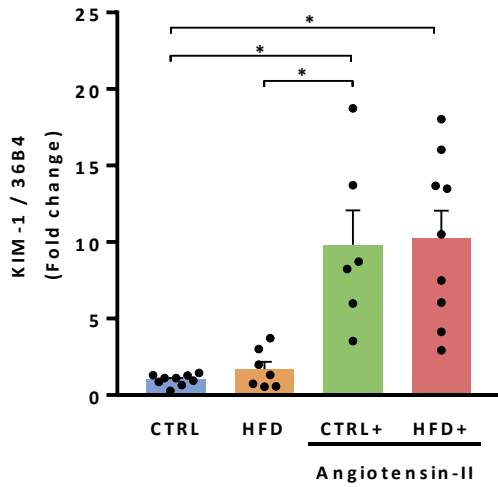

**B**

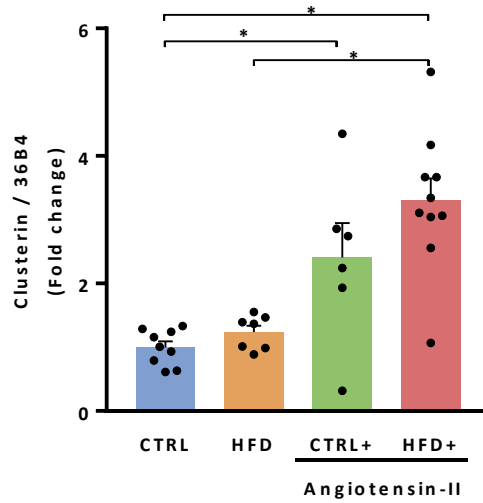

112

**C**

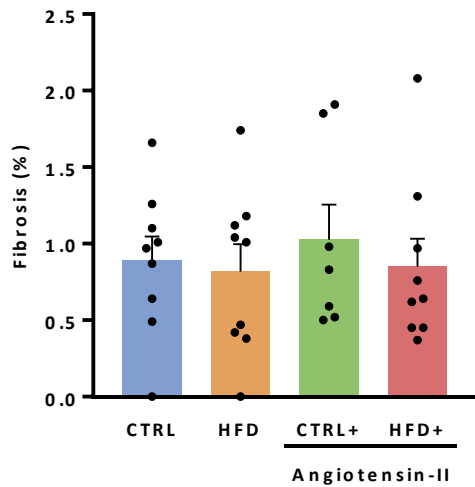

**D**

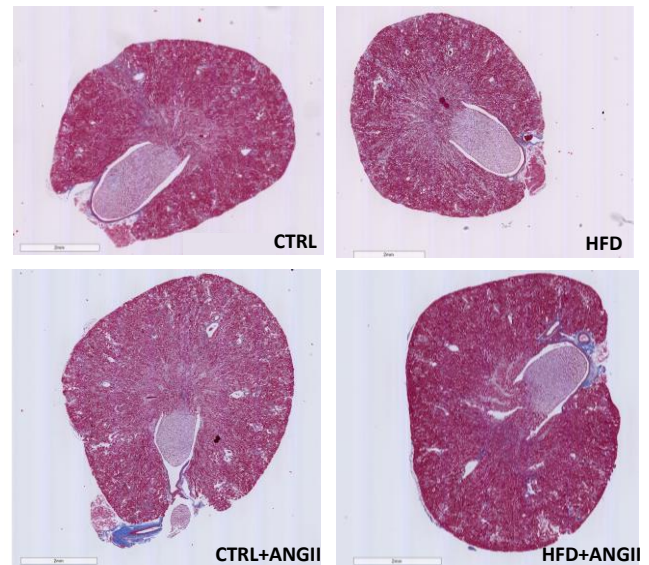

113

114

115

116 **Supplemental figure 2. Kidney injury and fibrosis markers**

117 A) LV mRNA expression levels of kidney injury marker (KIM-1). B) LV mRNA expression of Clusterin. C) Histological

118 analysis of kidney fibrosis, expressed in fold-change compared to reference control values (n=7-9 mice per group.

119 D) Images of histologic staining depicting kidney fibrosis (Masson). CTRL = control chow. HFD = high fat diet.

120 CTRL+ANGII = Angiotensin-II treated group on control chow. HFD+ANGII = Angiotensin-II treated group on high fat

121 diet. Data are presented as mean + SEM. \* = Kruskal Wallis test followed by Mann-Whitney-U P<0.05 is considered

122 significant.

123

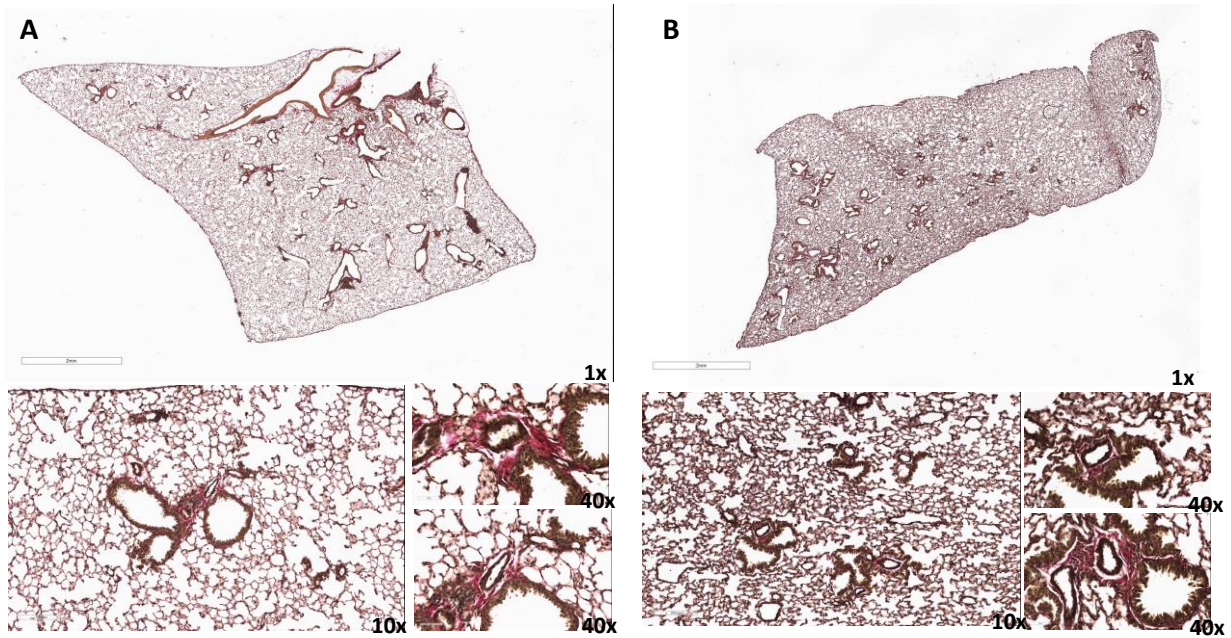

124

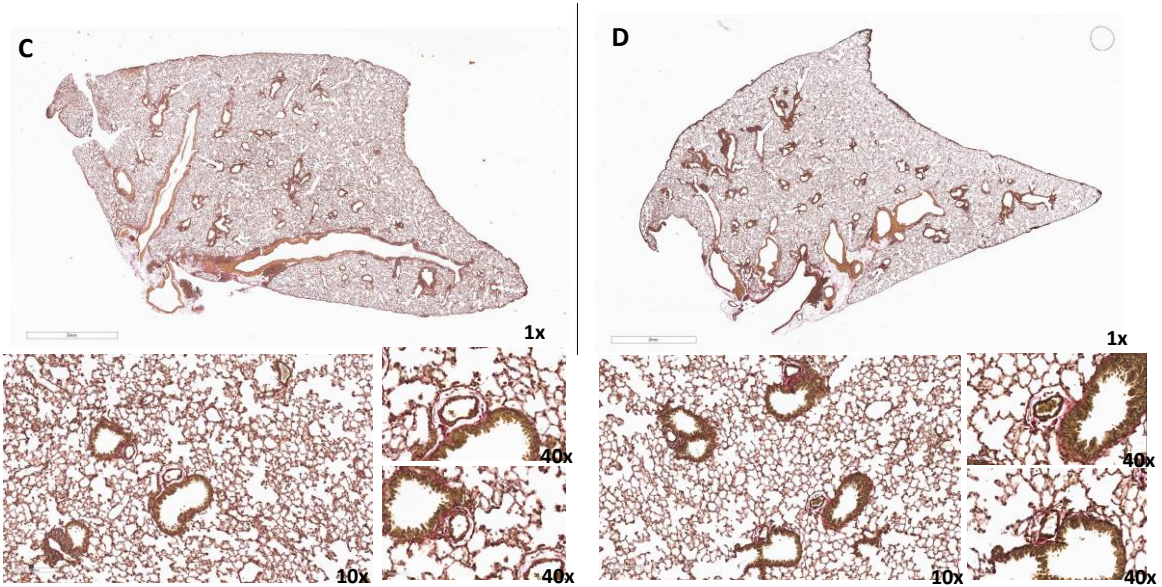

125

126 **Supplemental figure 3. Representative images of the Verhoeff-Van Gieson staining.**

127 A and B) representative image of CTRL animals. C and D) representative images of HFD+ANGII animals. Elastin in

128 black, collagen in red, endothelial cells in brown and blood cells in gold.

129

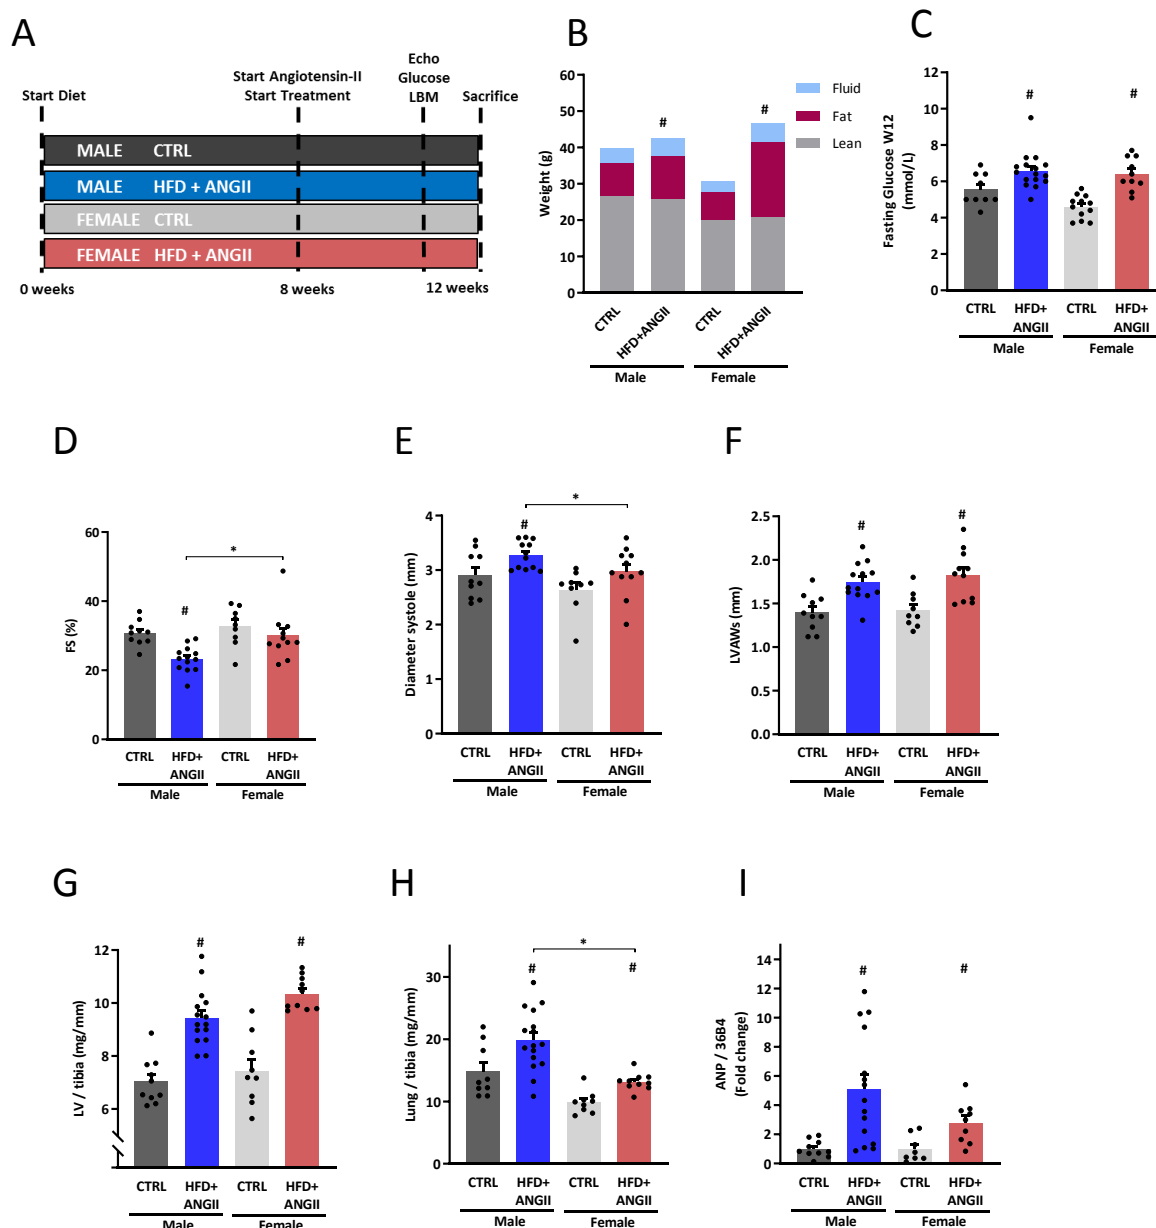

130  
 131 **Supplemental figure 3. Old male and female mice subjected to HFD+ANGII develop different phenotypes.**  
 132 A) Overview of experimental design. B) Body mass composition (fluid, fat, and lean mass) measured by minispec  
 133 LF90II body composition analyser (n=9-15 mice per group). C) Fasting glucose (n=9-15 mice per group). D)  
 134 Fractional shortening (FS, systolic function) (n=9-13 mice per group) E) LV end-systolic diameter (n=9-13 mice per  
 135 group). F) LVAWs = left ventricle anterior wall thickness in systole (n=9-13 mice per group). G) LV/tibia = left  
 136 ventricle weight corrected for tibia length (n=9-15 mice). H) Lung weight/tibia length (n=9-15 mice). I) LV mRNA  
 137 expression levels of Atrial Natriuretic Peptide (ANP) fold change compared to sex-matched controls (n=8-13 mice  
 138 per group).

139 CTRL = control chow. HFD+ANGII = Angiotensin-II treated group on high fat diet. Data are presented as means +  
140 SEM. # = compared to sex-matched controls \*= Male HFD +ANGII compared to Female HFD + ANGII. Kruskal Wallis  
141 test followed by Mann-Witney-U  $P < 0.05$  is considered significant.  
142
